# Supplementary material for: Super-base-derived hypergolic ionic fuels with remarkably improved thermal stability
Source: Royal Society of Chemistry journal article supplement (doi:10.1039/c5ta05559h), 2015-01-01
Supplement: c5ta05559h1.pdf [file c5ta05559h1.pdf]

## Supporting Information

### Super-Base-Derived Hypergolic Ionic Fuels with Remarkably Improved Thermal Stability

Wenquan Zhang, Xiujuan Qi, Shi Huang, Jinshan Li\*, and Qinghua Zhang\*

Research Center of Energetic Material Genome Science, Institute of Chemical Materials, China Academy of Engineering Physics (CAEP), Mianyang, 621900, China

E-mail: [qinghuazhang@caep.cn](mailto:qinghuazhang@caep.cn); Fax: (+86)816- 2495856

#### Table of Contents

|             |                                                                                   |
|-------------|-----------------------------------------------------------------------------------|
| Pages 2-5   | <i>Ab initio</i> computational data for cations and anions of ionic liquids       |
| Pages 6-17  | Optimized structures of cations                                                   |
| Pages 18    | Moisture sensitivity of HIL <b>IL10</b>                                           |
| Pages 19-32 | <sup>1</sup> H NMR and <sup>13</sup> C NMR spectra of ionic liquids <b>IL1-14</b> |

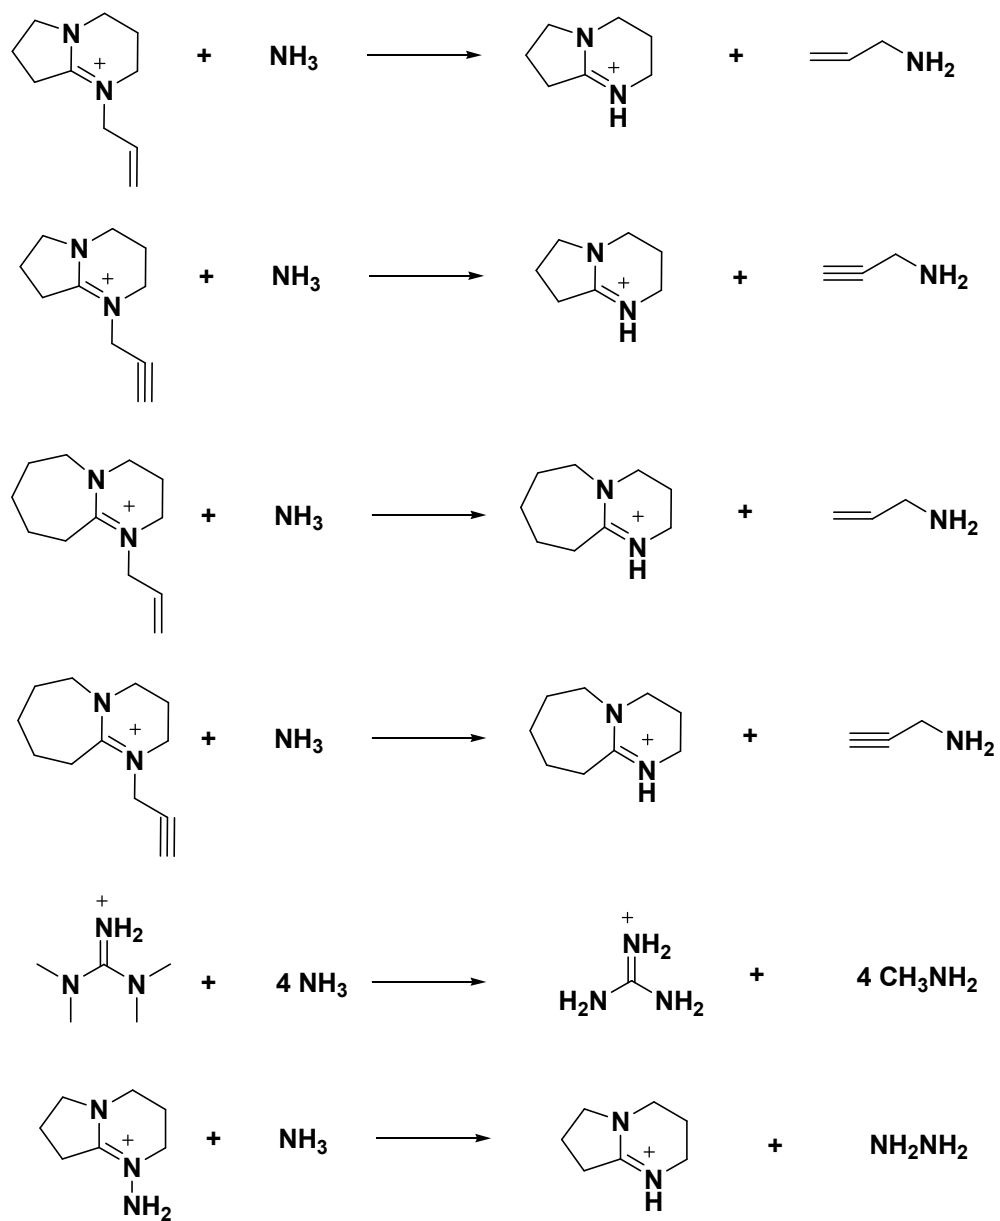

**Scheme S1.** Isodesmic reactions of seven super-base-derived cations

**Table S1.** Enthalpies of the gas-phase species for part cations (C<sup>+</sup>) and anions (A<sup>-</sup>) (G2 method)

| ions                                                                              | $\Delta H_f^\circ$ (kJ mol <sup>-1</sup> ) |
|-----------------------------------------------------------------------------------|--------------------------------------------|
| 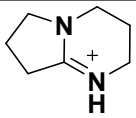 | +559.69                                    |
|  | +512.98                                    |
|  | +573.23                                    |
| <b>[N(CN)<sub>2</sub>]<sup>-</sup></b>                                            | +121.98                                    |
| <b>[BH<sub>3</sub>CN]<sup>-</sup></b>                                             | -92.83                                     |

**Table S2.** Enthalpies of the gas-phase species of eight cations based on isodesmic reactions

| Cations                                                                             | E(MP2) <sup>a</sup> | ZPE <sup>b</sup> | TCH <sup>c</sup> | $\Delta H_{\text{corr}}$ | $\Delta H_{\text{f}}^{\text{od}}$<br>(kJ mol <sup>-1</sup> ) |
|-------------------------------------------------------------------------------------|---------------------|------------------|------------------|--------------------------|--------------------------------------------------------------|
| 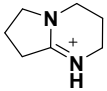   | -382.825493         | 0.202261         | 0.211132         | -382.62                  | 559.69                                                       |
|    | -499.192487         | 0.263392         | 0.275958         | -498.93                  | 626.73                                                       |
|    | -497.955777         | 0.239356         | 0.251664         | -497.71                  | 803.73                                                       |
|    | -461.220043         | 0.260521         | 0.271393         | -460.96                  | 512.98                                                       |
|  | -577.581076         | 0.321841         | 0.336354         | -577.26                  | 596.00                                                       |
|  | -576.345015         | 0.297824         | 0.312084         | -576.04                  | 771.36                                                       |
|  | -362.015649         | 0.202000         | 0.213478         | -361.81                  | 539.78                                                       |
|  | -438.012427         | 0.218346         | 0.228698         | -437.79                  | 647.57                                                       |

<sup>a</sup> Total energy calculated by B3LYP/6-31+G\*\*//MP2/6-311++G\*\* method (Hartree/Particle); <sup>b</sup> zero-point correction (Hartree/Particle); <sup>c</sup> thermal correction to enthalpy (Hartree/Particle); <sup>d</sup> heat of formation (kJ/mol).

**Table S3.** The calculated enthalpies of fourteen new HILs

| <b>Compounds</b> | $\Delta H_{\text{cation}}(\text{kJ/mol})$ | $\Delta H_{\text{anion}}(\text{kJ/mol})$ | $U_{\text{pot}}(\text{kJ/mol})$ | $\Delta H_{\text{Lat}}(\text{kJ/mol})$ | $\Delta H_{\text{salt}}(\text{kJ/mol})$ |
|------------------|-------------------------------------------|------------------------------------------|---------------------------------|----------------------------------------|-----------------------------------------|
| 1                | 626.73                                    | 121.98                                   | 438.71                          | 443.67                                 | 305.04                                  |
| 2                | 803.73                                    | 121.98                                   | 442.14                          | 447.09                                 | 478.62                                  |
| 3                | 647.57                                    | 121.98                                   | 459.29                          | 464.24                                 | 305.31                                  |
| 4                | 559.69                                    | 121.98                                   | 464.55                          | 469.51                                 | 212.16                                  |
| 5                | 596.00                                    | 121.98                                   | 425.23                          | 430.18                                 | 287.80                                  |
| 6                | 771.36                                    | 121.98                                   | 428.20                          | 433.16                                 | 460.18                                  |
| 7                | 512.98                                    | 121.98                                   | 454.65                          | 459.61                                 | 175.34                                  |
| 8                | 626.73                                    | -92.83                                   | 440.13                          | 445.08                                 | 88.82                                   |
| 9                | 803.73                                    | -92.83                                   | 444.06                          | 449.01                                 | 261.89                                  |
| 10               | 559.69                                    | -92.83                                   | 467.34                          | 472.30                                 | -5.43                                   |
| 11               | 596.00                                    | -92.83                                   | 426.36                          | 431.32                                 | 71.85                                   |
| 12               | 771.36                                    | -92.83                                   | 429.14                          | 434.09                                 | 244.44                                  |
| 13               | 512.98                                    | -92.83                                   | 453.14                          | 458.10                                 | -37.95                                  |
| 14               | 539.78                                    | -92.83                                   | 463.86                          | 468.82                                 | -21.87                                  |

The geometries and XYZ coordinates of eight cations are in the follows.

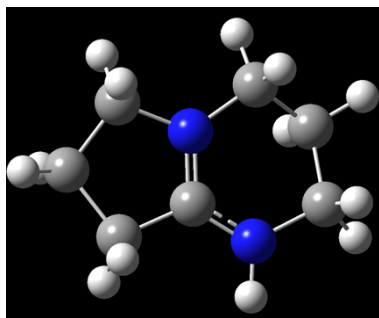

2,3,4,6,7,8-hexahydropyrrolo[1,2-a]pyrimidin-1-ium XYZ orientation:

| Center Number | Atomic Number | Atomic Type | Coordinates (Angstroms) |           |           |
|---------------|---------------|-------------|-------------------------|-----------|-----------|
|               |               |             | X                       | Y         | Z         |
| 1             | 6             | 0           | 2.504952                | 0.004877  | 0.277000  |
| 2             | 6             | 0           | 1.629474                | 1.195923  | -0.161338 |
| 3             | 6             | 0           | 1.640825                | -1.241192 | -0.030722 |
| 4             | 6             | 0           | 0.246001                | -0.678460 | -0.044287 |
| 5             | 1             | 0           | 2.705212                | 0.064294  | 1.349948  |
| 6             | 1             | 0           | 1.855942                | -1.661164 | -1.021609 |
| 7             | 1             | 0           | 1.833929                | 1.522343  | -1.187847 |
| 8             | 1             | 0           | 3.462858                | -0.014846 | -0.244035 |
| 9             | 1             | 0           | 1.711603                | 2.061729  | 0.500079  |
| 10            | 1             | 0           | 1.752770                | -2.046933 | 0.699854  |
| 11            | 7             | 0           | -0.875189               | -1.385447 | -0.048092 |
| 12            | 6             | 0           | -0.965380               | 1.451408  | -0.179545 |
| 13            | 6             | 0           | -2.205938               | -0.752858 | -0.148466 |
| 14            | 1             | 0           | -0.806256               | -2.393807 | -0.007110 |
| 15            | 6             | 0           | -2.137409               | 0.666610  | 0.421345  |
| 16            | 1             | 0           | -1.146127               | 1.709735  | -1.230104 |
| 17            | 1             | 0           | -0.796339               | 2.381523  | 0.369190  |

|           |          |          |                  |                  |                  |
|-----------|----------|----------|------------------|------------------|------------------|
|           |          |          |                  |                  |                  |
| <b>18</b> | <b>1</b> | <b>0</b> | <b>-2.519215</b> | <b>-0.748189</b> | <b>-1.198544</b> |
| <b>19</b> | <b>1</b> | <b>0</b> | <b>-2.913209</b> | <b>-1.365450</b> | <b>0.414243</b>  |
| <b>20</b> | <b>1</b> | <b>0</b> | <b>-3.072801</b> | <b>1.189758</b>  | <b>0.208020</b>  |
| <b>21</b> | <b>1</b> | <b>0</b> | <b>-2.027600</b> | <b>0.620593</b>  | <b>1.509863</b>  |
| <b>22</b> | <b>7</b> | <b>0</b> | <b>0.258629</b>  | <b>0.642955</b>  | <b>-0.089890</b> |

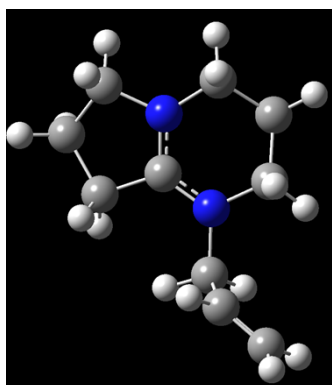

**1-allyl-2,3,4,6,7,8-hexahydropyrrolo[1,2-a]pyrimidin-1-ium orientation:**

| <b>Center Number</b> | <b>Atomic Number</b> | <b>Atomic Type</b> | <b>Coordinates (Angstroms)</b> |                  |                  |
|----------------------|----------------------|--------------------|--------------------------------|------------------|------------------|
|                      |                      |                    | <b>X</b>                       | <b>Y</b>         | <b>Z</b>         |
| <b>1</b>             | <b>6</b>             | <b>0</b>           | <b>-2.515992</b>               | <b>-1.761653</b> | <b>-0.170105</b> |
| <b>2</b>             | <b>6</b>             | <b>0</b>           | <b>-2.824182</b>               | <b>-0.394005</b> | <b>0.461907</b>  |
| <b>3</b>             | <b>6</b>             | <b>0</b>           | <b>-0.972624</b>               | <b>-1.836916</b> | <b>-0.192085</b> |
| <b>4</b>             | <b>6</b>             | <b>0</b>           | <b>-0.555156</b>               | <b>-0.385703</b> | <b>-0.125058</b> |
| <b>5</b>             | <b>1</b>             | <b>0</b>           | <b>-2.903962</b>               | <b>-1.796622</b> | <b>-1.191515</b> |
| <b>6</b>             | <b>1</b>             | <b>0</b>           | <b>-0.569651</b>               | <b>-2.362186</b> | <b>0.682910</b>  |
| <b>7</b>             | <b>1</b>             | <b>0</b>           | <b>-2.985819</b>               | <b>-0.450713</b> | <b>1.545453</b>  |
| <b>8</b>             | <b>1</b>             | <b>0</b>           | <b>-2.963444</b>               | <b>-2.585447</b> | <b>0.387538</b>  |
| <b>9</b>             | <b>1</b>             | <b>0</b>           | <b>-3.684617</b>               | <b>0.107347</b>  | <b>0.011773</b>  |

|    |   |   |           |           |           |
|----|---|---|-----------|-----------|-----------|
| 10 | 1 | 0 | -0.587348 | -2.339687 | -1.081625 |
| 11 | 7 | 0 | 0.667894  | 0.092153  | -0.312491 |
| 12 | 6 | 0 | -1.505439 | 1.830299  | 0.389137  |
| 13 | 6 | 0 | 0.933953  | 1.540339  | -0.141664 |
| 14 | 6 | 0 | -0.322458 | 2.363517  | -0.418709 |
| 15 | 1 | 0 | -1.394078 | 2.043270  | 1.459919  |
| 16 | 1 | 0 | -2.445246 | 2.278459  | 0.055573  |
| 17 | 1 | 0 | 1.311114  | 1.711319  | 0.872609  |
| 18 | 1 | 0 | 1.733047  | 1.807607  | -0.837239 |
| 19 | 1 | 0 | -0.135750 | 3.408096  | -0.156934 |
| 20 | 1 | 0 | -0.561990 | 2.330554  | -1.486981 |
| 21 | 7 | 0 | -1.597156 | 0.381165  | 0.190040  |
| 22 | 6 | 0 | 1.839959  | -0.769474 | -0.603562 |
| 23 | 1 | 0 | 1.476027  | -1.778491 | -0.805907 |
| 24 | 1 | 0 | 2.306829  | -0.396682 | -1.521523 |
| 25 | 6 | 0 | 2.834588  | -0.782121 | 0.529108  |
| 26 | 6 | 0 | 4.108956  | -0.408296 | 0.397148  |
| 27 | 1 | 0 | 2.468807  | -1.151530 | 1.486807  |
| 28 | 1 | 0 | 4.804759  | -0.468445 | 1.227879  |
| 29 | 1 | 0 | 4.506529  | -0.045996 | -0.548269 |

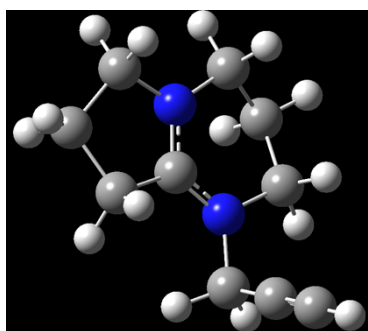



**1-(prop-2-yn-1-yl)-2,3,4,6,7,8-hexahydropyrrolo[1,2-a]pyrimidin-1-ium XYZ orientation:**

| Center Number | Atomic Number | Atomic Type | Coordinates (Angstroms) |           |           |
|---------------|---------------|-------------|-------------------------|-----------|-----------|
|               |               |             | X                       | Y         | Z         |
| 1             | 6             | 0           | -2.075593               | -2.007211 | -0.193961 |
| 2             | 6             | 0           | -2.516474               | -0.746594 | 0.570236  |
| 3             | 6             | 0           | -0.552749               | -1.828272 | -0.390217 |
| 4             | 6             | 0           | -0.360506               | -0.338802 | -0.246216 |
| 5             | 1             | 0           | -2.573591               | -2.047863 | -1.166136 |
| 6             | 1             | 0           | 0.034548                | -2.332317 | 0.387803  |
| 7             | 1             | 0           | -2.550861               | -0.893694 | 1.656507  |
| 8             | 1             | 0           | -2.318558               | -2.922938 | 0.346438  |
| 9             | 1             | 0           | -3.484661               | -0.358452 | 0.244297  |
| 10            | 1             | 0           | -0.203965               | -2.202166 | -1.355550 |
| 11            | 7             | 0           | 0.745107                | 0.341743  | -0.533198 |
| 12            | 6             | 0           | -1.550538               | 1.653724  | 0.585550  |
| 13            | 6             | 0           | 0.836053                | 1.782478  | -0.201167 |
| 14            | 6             | 0           | -0.543894               | 2.435180  | -0.259147 |
| 15            | 1             | 0           | -1.364657               | 1.779561  | 1.659447  |
| 16            | 1             | 0           | -2.573433               | 1.981875  | 0.382570  |
| 17            | 1             | 0           | 1.291155                | 1.885452  | 0.791045  |
| 18            | 1             | 0           | 1.510533                | 2.242914  | -0.927144 |
| 19            | 1             | 0           | -0.473881               | 3.462597  | 0.106851  |
| 20            | 1             | 0           | -0.889314               | 2.479353  | -1.297427 |
| 21            | 7             | 0           | -1.454780               | 0.229321  | 0.246949  |
| 22            | 6             | 0           | 2.001318                | -0.341479 | -0.914596 |
| 23            | 1             | 0           | 1.759118                | -1.264838 | -1.445470 |

|    |   |   |          |           |           |
|----|---|---|----------|-----------|-----------|
| 24 | 1 | 0 | 2.517715 | 0.305933  | -1.630982 |
| 25 | 6 | 0 | 2.861255 | -0.617551 | 0.237708  |
| 26 | 6 | 0 | 3.580195 | -0.837483 | 1.183548  |
| 27 | 1 | 0 | 4.213160 | -1.036801 | 2.021068  |

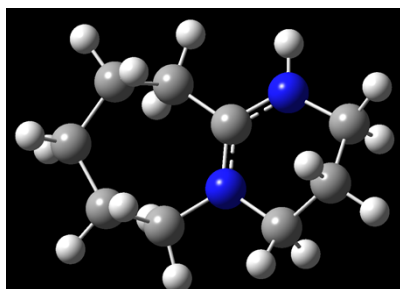

2,3,4,6,7,8,9,10-octahydropyrimido[1,2-a]azepin-1-ium XYZ orientation:

| Center Number | Atomic Number | Atomic Type | Coordinates (Angstroms) |           |           |
|---------------|---------------|-------------|-------------------------|-----------|-----------|
|               |               |             | X                       | Y         | Z         |
| 1             | 6             | 0           | -2.042404               | -1.299585 | 0.365253  |
| 2             | 6             | 0           | -2.836714               | 0.013655  | 0.354998  |
| 3             | 6             | 0           | -1.999553               | 1.285677  | 0.545891  |
| 4             | 6             | 0           | -0.951222               | -1.382086 | -0.710037 |
| 5             | 6             | 0           | -0.920070               | 1.512230  | -0.541551 |
| 6             | 6             | 0           | 0.328374                | 0.689850  | -0.347085 |
| 7             | 1             | 0           | -1.590245               | -1.474574 | 1.350020  |
| 8             | 1             | 0           | -3.383746               | 0.089507  | -0.594753 |
| 9             | 1             | 0           | -1.525073               | 1.291429  | 1.535366  |
| 10            | 1             | 0           | -1.335092               | 1.295700  | -1.533929 |
| 11            | 1             | 0           | -1.324204               | -1.028279 | -1.677469 |
| 12            | 1             | 0           | -2.734920               | -2.130815 | 0.191121  |
| 13            | 1             | 0           | -3.597944               | -0.025760 | 1.141171  |

|    |   |   |           |           |           |
|----|---|---|-----------|-----------|-----------|
| 14 | 1 | 0 | -2.667164 | 2.152782  | 0.520538  |
| 15 | 1 | 0 | -0.638422 | -2.417146 | -0.856371 |
| 16 | 1 | 0 | -0.626817 | 2.565720  | -0.557268 |
| 17 | 7 | 0 | 1.471556  | 1.342752  | -0.125081 |
| 18 | 6 | 0 | 1.502162  | -1.449157 | -0.104602 |
| 19 | 6 | 0 | 2.772189  | 0.695339  | 0.098743  |
| 20 | 1 | 0 | 1.427401  | 2.352341  | -0.110403 |
| 21 | 6 | 0 | 2.526001  | -0.675278 | 0.720907  |
| 22 | 1 | 0 | 1.922359  | -1.771153 | -1.065094 |
| 23 | 1 | 0 | 1.178933  | -2.343060 | 0.434052  |
| 24 | 1 | 0 | 3.305615  | 0.612724  | -0.855295 |
| 25 | 1 | 0 | 3.358326  | 1.336684  | 0.760427  |
| 26 | 1 | 0 | 3.459402  | -1.242094 | 0.764210  |
| 27 | 1 | 0 | 2.164123  | -0.555123 | 1.747621  |
| 28 | 7 | 0 | 0.290571  | -0.636001 | -0.373354 |

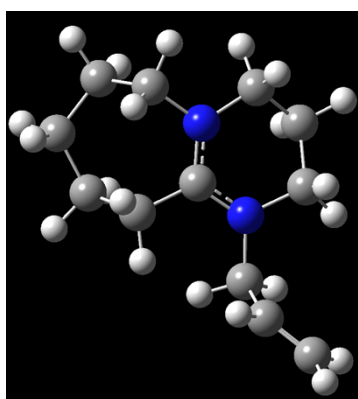

1-allyl-2,3,4,6,7,8,9,10-octahydropyrimido[1,2-a]azepin-1-ium XYZ orientation:

| Center Number | Atomic Number | Atomic Type | Coordinates (Angstroms) |   |   |
|---------------|---------------|-------------|-------------------------|---|---|
|               |               |             | X                       | Y | Z |

|    |   |   |           |           |           |
|----|---|---|-----------|-----------|-----------|
| 1  | 6 | 0 | -3.284123 | -0.029874 | -0.055196 |
| 2  | 6 | 0 | -3.077462 | -1.534124 | -0.275373 |
| 3  | 6 | 0 | -1.661519 | -1.937366 | -0.709195 |
| 4  | 6 | 0 | -2.319913 | 0.588622  | 0.966398  |
| 5  | 6 | 0 | -0.552251 | -1.528656 | 0.295606  |
| 6  | 6 | 0 | -0.088842 | -0.097178 | 0.147346  |
| 7  | 1 | 0 | -3.200257 | 0.518291  | -1.002662 |
| 8  | 1 | 0 | -3.322472 | -2.064366 | 0.655176  |
| 9  | 1 | 0 | -1.429451 | -1.525418 | -1.699355 |
| 10 | 1 | 0 | -0.916574 | -1.659717 | 1.321542  |
| 11 | 1 | 0 | -2.226962 | -0.044795 | 1.854441  |
| 12 | 1 | 0 | -4.303990 | 0.137374  | 0.309244  |
| 13 | 1 | 0 | -3.792875 | -1.888960 | -1.024757 |
| 14 | 1 | 0 | -1.623446 | -3.026462 | -0.812684 |
| 15 | 1 | 0 | -2.702508 | 1.550123  | 1.313286  |
| 16 | 1 | 0 | 0.297347  | -2.199994 | 0.205352  |
| 17 | 7 | 0 | 1.157657  | 0.186123  | -0.254063 |
| 18 | 6 | 0 | -0.687521 | 2.311664  | 0.196357  |
| 19 | 6 | 0 | 1.638517  | 1.584388  | -0.245218 |
| 20 | 6 | 0 | 0.521457  | 2.510338  | -0.702771 |
| 21 | 1 | 0 | -0.542021 | 2.790849  | 1.171999  |
| 22 | 1 | 0 | -1.581881 | 2.747944  | -0.257348 |
| 23 | 1 | 0 | 1.982804  | 1.839380  | 0.764137  |
| 24 | 1 | 0 | 2.500035  | 1.643706  | -0.911302 |
| 25 | 1 | 0 | 0.848433  | 3.552343  | -0.653851 |
| 26 | 1 | 0 | 0.265689  | 2.292775  | -1.745317 |

|    |   |   |           |           |           |
|----|---|---|-----------|-----------|-----------|
| 27 | 7 | 0 | -0.965187 | 0.875117  | 0.425569  |
| 28 | 6 | 0 | 2.176927  | -0.830357 | -0.630933 |
| 29 | 1 | 0 | 1.671835  | -1.722613 | -1.002174 |
| 30 | 1 | 0 | 2.730480  | -0.416434 | -1.478176 |
| 31 | 6 | 0 | 3.117038  | -1.154131 | 0.501446  |
| 32 | 6 | 0 | 4.438546  | -0.976782 | 0.439713  |
| 33 | 1 | 0 | 2.665029  | -1.573861 | 1.399811  |
| 34 | 1 | 0 | 5.085424  | -1.250597 | 1.267051  |
| 35 | 1 | 0 | 4.922929  | -0.567509 | -0.444044 |

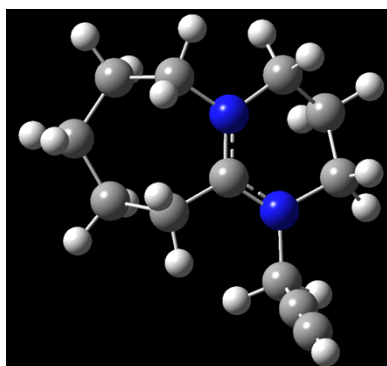

1-(prop-2-yn-1-yl)-2,3,4,6,7,8,9,10-octahydropyrimido[1,2-a]azepin-1-ium XYZ orientation:

| Center Number | Atomic Number | Atomic Type | Coordinates (Angstroms) |           |           |
|---------------|---------------|-------------|-------------------------|-----------|-----------|
|               |               |             | X                       | Y         | Z         |
| 1             | 6             | 0           | -3.118958               | -0.113554 | 0.056072  |
| 2             | 6             | 0           | -2.869616               | -1.581910 | -0.313153 |
| 3             | 6             | 0           | -1.468147               | -1.885402 | -0.860090 |
| 4             | 6             | 0           | -2.122410               | 0.451120  | 1.077678  |
| 5             | 6             | 0           | -0.314496               | -1.513135 | 0.108937  |
| 6             | 6             | 0           | 0.070505                | -0.052705 | 0.059658  |
| 7             | 1             | 0           | -3.110325               | 0.521430  | -0.839409 |

|    |   |   |           |           |           |
|----|---|---|-----------|-----------|-----------|
| 8  | 1 | 0 | -3.039840 | -2.203046 | 0.576871  |
| 9  | 1 | 0 | -1.313329 | -1.385639 | -1.824879 |
| 10 | 1 | 0 | -0.603099 | -1.751413 | 1.139285  |
| 11 | 1 | 0 | -1.949269 | -0.256918 | 1.894519  |
| 12 | 1 | 0 | -4.121619 | -0.023598 | 0.488947  |
| 13 | 1 | 0 | -3.614662 | -1.897782 | -1.050963 |
| 14 | 1 | 0 | -1.393558 | -2.959795 | -1.055922 |
| 15 | 1 | 0 | -2.521273 | 1.357897  | 1.535092  |
| 16 | 1 | 0 | 0.557465  | -2.130149 | -0.090372 |
| 17 | 7 | 0 | 1.265297  | 0.321583  | -0.426235 |
| 18 | 6 | 0 | -0.589263 | 2.309882  | 0.407572  |
| 19 | 6 | 0 | 1.700120  | 1.733280  | -0.361626 |
| 20 | 6 | 0 | 0.506504  | 2.647784  | -0.589866 |
| 21 | 1 | 0 | -0.344543 | 2.675395  | 1.412208  |
| 22 | 1 | 0 | -1.535253 | 2.768833  | 0.108449  |
| 23 | 1 | 0 | 2.171067  | 1.919393  | 0.611582  |
| 24 | 1 | 0 | 2.457353  | 1.883543  | -1.132743 |
| 25 | 1 | 0 | 0.805193  | 3.692227  | -0.468006 |
| 26 | 1 | 0 | 0.139803  | 2.526419  | -1.614718 |
| 27 | 7 | 0 | -0.814878 | 0.848347  | 0.489932  |
| 28 | 6 | 0 | 2.299163  | -0.652771 | -0.859446 |
| 29 | 1 | 0 | 1.838689  | -1.440946 | -1.459438 |
| 30 | 1 | 0 | 2.965726  | -0.113061 | -1.537568 |
| 31 | 6 | 0 | 3.065971  | -1.214421 | 0.253040  |
| 32 | 6 | 0 | 3.704111  | -1.675653 | 1.169517  |
| 33 | 1 | 0 | 4.277633  | -2.087386 | 1.971432  |

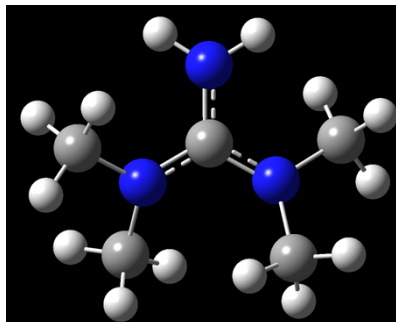

**bis(dimethylamino)methaniminium XYZ orientation:**

| Center Number | Atomic Number | Atomic Type | Coordinates (Angstroms) |           |           |
|---------------|---------------|-------------|-------------------------|-----------|-----------|
|               |               |             | X                       | Y         | Z         |
| 1             | 6             | 0           | -0.000008               | 0.495886  | 0.000043  |
| 2             | 7             | 0           | 1.175962                | -0.159804 | 0.025362  |
| 3             | 7             | 0           | 0.000010                | 1.845606  | 0.000104  |
| 4             | 1             | 0           | 0.798286                | 2.369885  | 0.325234  |
| 5             | 1             | 0           | -0.798264               | 2.370022  | -0.324807 |
| 6             | 7             | 0           | -1.175943               | -0.159760 | -0.025477 |
| 7             | 6             | 0           | -2.423798               | 0.485906  | 0.409290  |
| 8             | 1             | 0           | -2.949685               | 0.955776  | -0.430817 |
| 9             | 1             | 0           | -3.075074               | -0.281038 | 0.834036  |
| 10            | 1             | 0           | -2.219589               | 1.226896  | 1.183084  |
| 11            | 6             | 0           | -1.343184               | -1.450512 | -0.713356 |
| 12            | 1             | 0           | -0.441527               | -1.706318 | -1.267143 |
| 13            | 1             | 0           | -1.579288               | -2.249036 | -0.003998 |
| 14            | 1             | 0           | -2.169504               | -1.357778 | -1.424321 |

|    |   |   |          |           |           |
|----|---|---|----------|-----------|-----------|
| 15 | 6 | 0 | 2.423764 | 0.485890  | -0.409524 |
| 16 | 1 | 0 | 2.949638 | 0.955953  | 0.430496  |
| 17 | 1 | 0 | 3.075094 | -0.281100 | -0.834098 |
| 18 | 1 | 0 | 2.219461 | 1.226720  | -1.183438 |
| 19 | 6 | 0 | 1.343209 | -1.450419 | 0.713498  |
| 20 | 1 | 0 | 0.441748 | -1.705811 | 1.267824  |
| 21 | 1 | 0 | 1.578712 | -2.249252 | 0.004278  |
| 22 | 1 | 0 | 2.169891 | -1.357718 | 1.424043  |

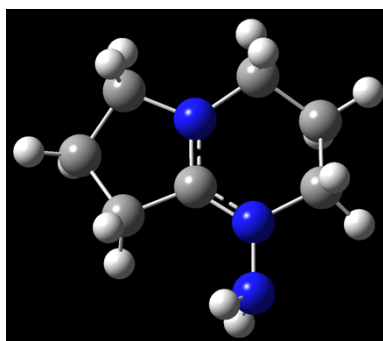

**1-amino-2,3,4,6,7,8-hexahydropyrrolo[1,2-a]pyrimidin-1-ium XYZ orientation:**

| Center Number | Atomic Number | Atomic Type | Coordinates (Angstroms) |           |           |
|---------------|---------------|-------------|-------------------------|-----------|-----------|
|               |               |             | X                       | Y         | Z         |
| 1             | 6             | 0           | -2.579151               | 0.380858  | 0.274634  |
| 2             | 6             | 0           | -2.044368               | -0.992421 | -0.172558 |
| 3             | 6             | 0           | -1.415606               | 1.359303  | -0.010007 |



|    |   |   |           |           |           |
|----|---|---|-----------|-----------|-----------|
| 4  | 6 | 0 | -0.214275 | 0.452771  | -0.028060 |
| 5  | 1 | 0 | -2.797690 | 0.365888  | 1.345602  |
| 6  | 1 | 0 | -1.509071 | 1.840021  | -0.992753 |
| 7  | 1 | 0 | -2.317197 | -1.242797 | -1.204844 |
| 8  | 1 | 0 | -3.493219 | 0.658916  | -0.251418 |
| 9  | 1 | 0 | -2.359905 | -1.812750 | 0.476594  |
| 10 | 1 | 0 | -1.323103 | 2.155977  | 0.731957  |
| 11 | 7 | 0 | 1.058178  | 0.841933  | -0.031401 |
| 12 | 6 | 0 | 0.380142  | -1.929211 | -0.194481 |
| 13 | 6 | 0 | 2.162089  | -0.139499 | -0.128888 |
| 14 | 6 | 0 | 1.715247  | -1.496112 | 0.416773  |
| 15 | 1 | 0 | 0.487485  | -2.206018 | -1.250657 |
| 16 | 1 | 0 | -0.035399 | -2.789636 | 0.336425  |
| 17 | 1 | 0 | 2.477113  | -0.202811 | -1.176953 |
| 18 | 1 | 0 | 2.994187  | 0.268793  | 0.446424  |
| 19 | 1 | 0 | 2.480575  | -2.243909 | 0.194281  |
| 20 | 1 | 0 | 1.618021  | -1.442886 | 1.506426  |
| 21 | 7 | 0 | -0.577715 | -0.822198 | -0.083565 |
| 22 | 7 | 0 | 1.444386  | 2.192964  | -0.042476 |
| 23 | 1 | 0 | 1.057870  | 2.692476  | -0.837767 |
| 24 | 1 | 0 | 1.221921  | 2.655707  | 0.834303  |

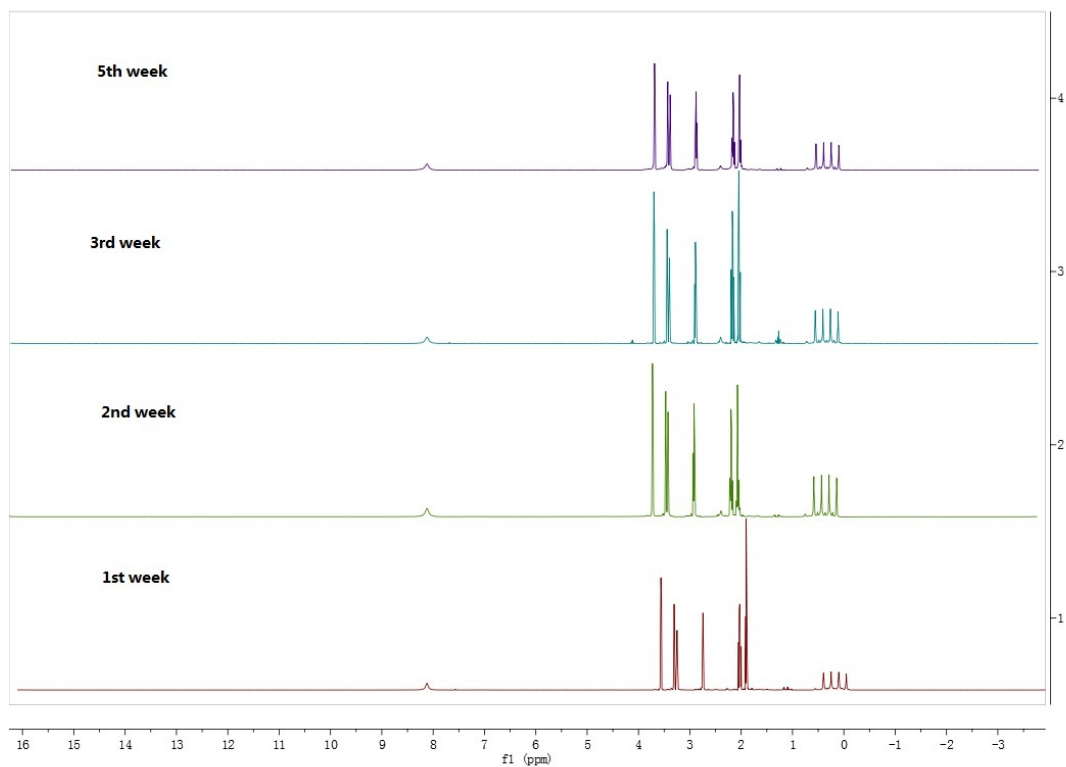

**Figure S1.** Stability study of **IL10**; The <sup>1</sup>H NMR changes of **IL10** dissolved in CD<sub>3</sub>CN are dependent on the time.

Figure S2-S29.  $^1\text{H}$  NMR and  $^{13}\text{C}$  NMR spectra of HILs 1-14 in  $\text{CD}_3\text{CN}$

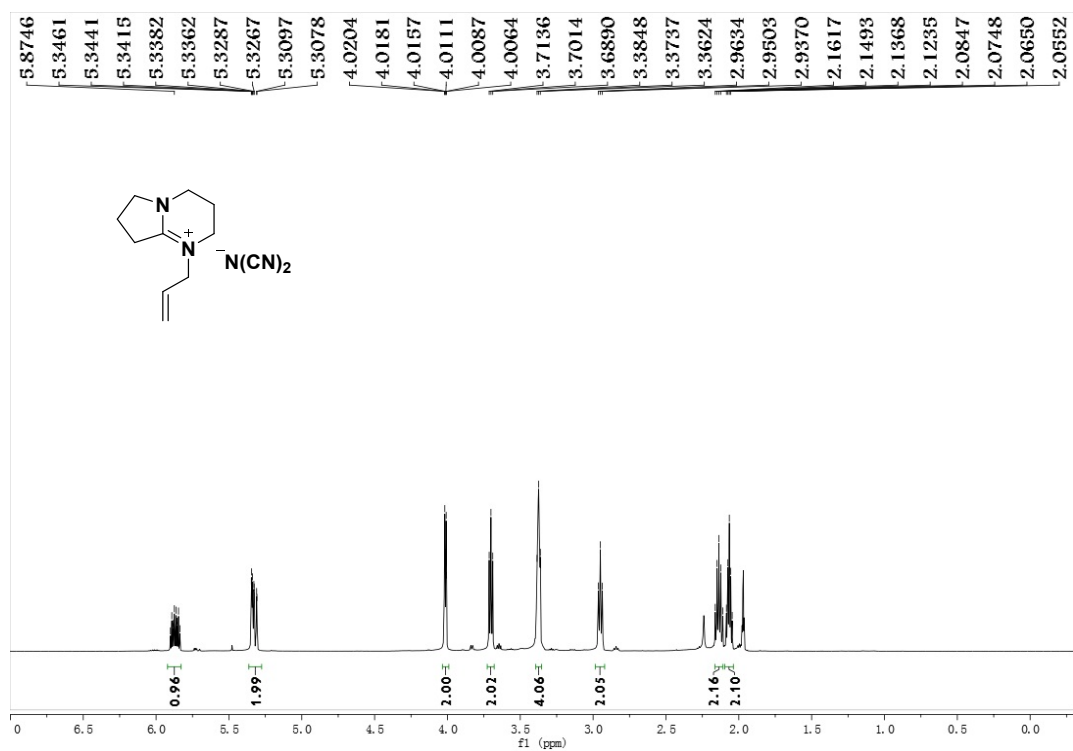

Figure S2.  $^1\text{H}$  NMR of IL1

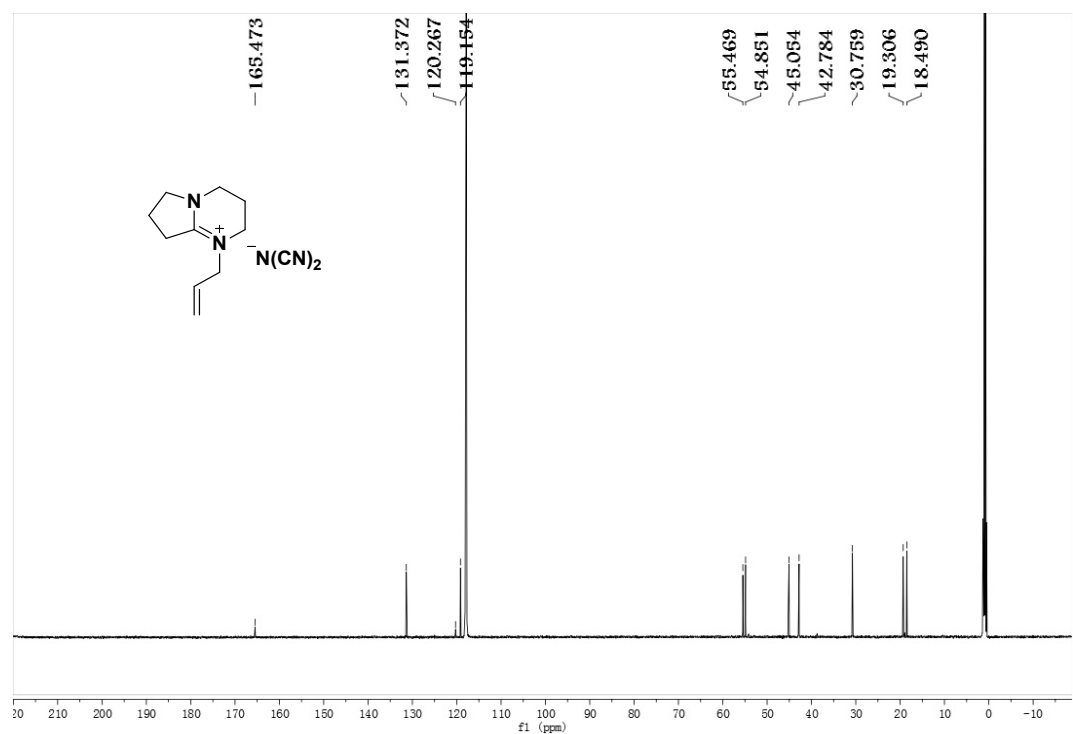

Figure S3.  $^{13}\text{C}$  NMR of IL1

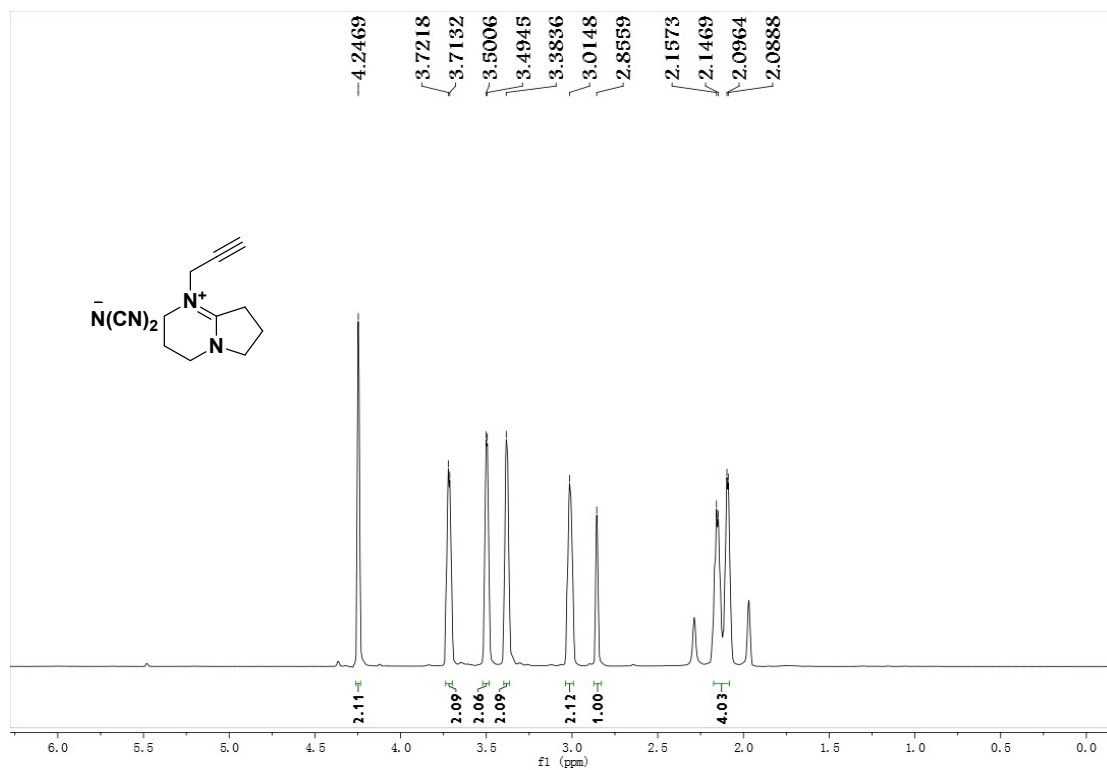

Figure S4.  $^1\text{H}$  NMR of IL2

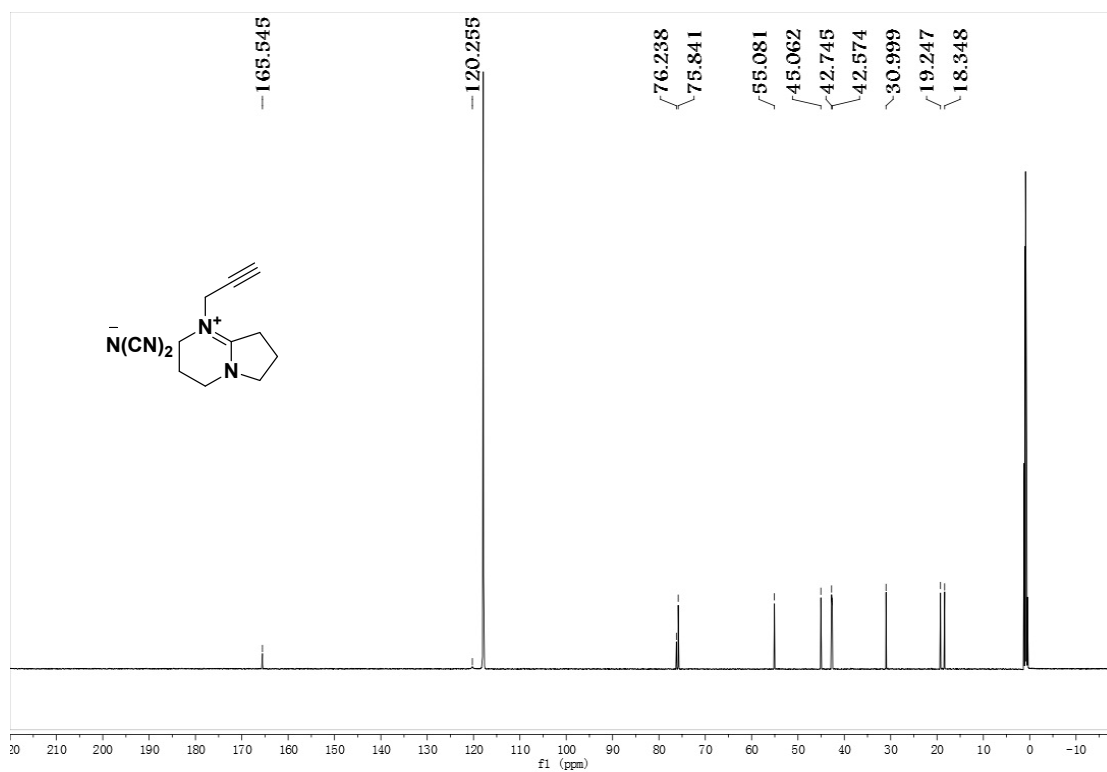

Figure S5.  $^{13}\text{C}$  NMR of IL2

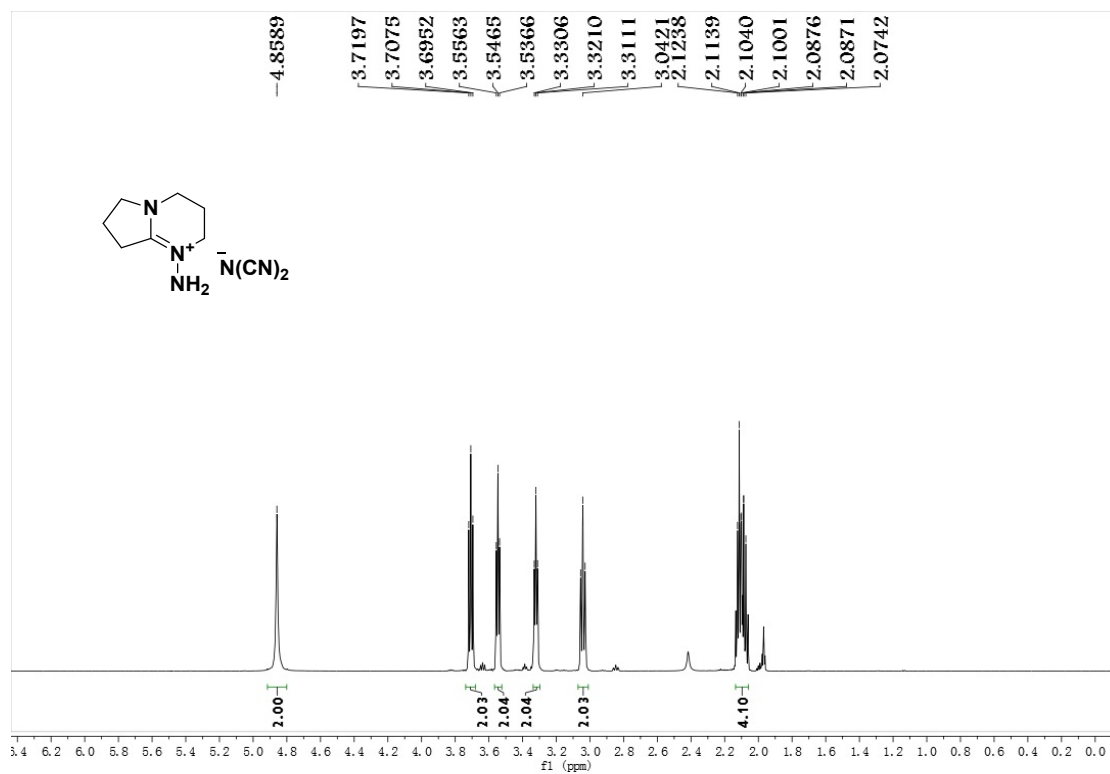

Figure S6.  $^1\text{H}$  NMR of IL3

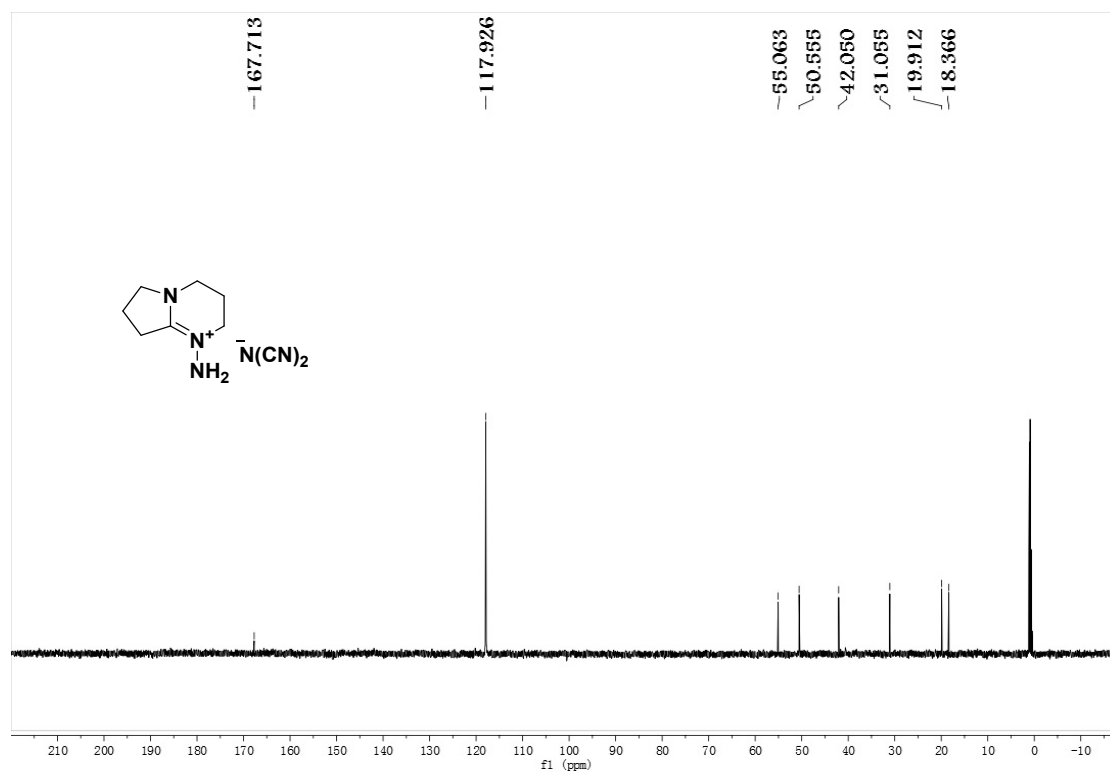

Figure S7.  $^{13}\text{C}$  NMR of IL3

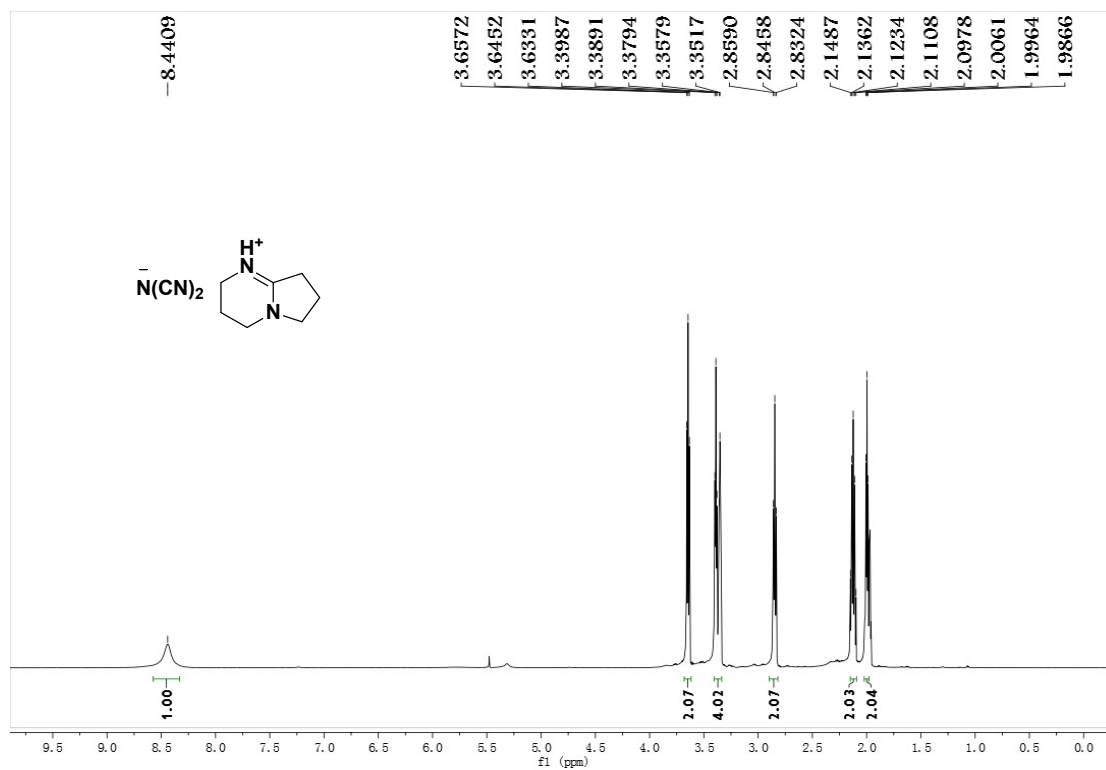

Figure S8.  $^1\text{H NMR}$  of IL4

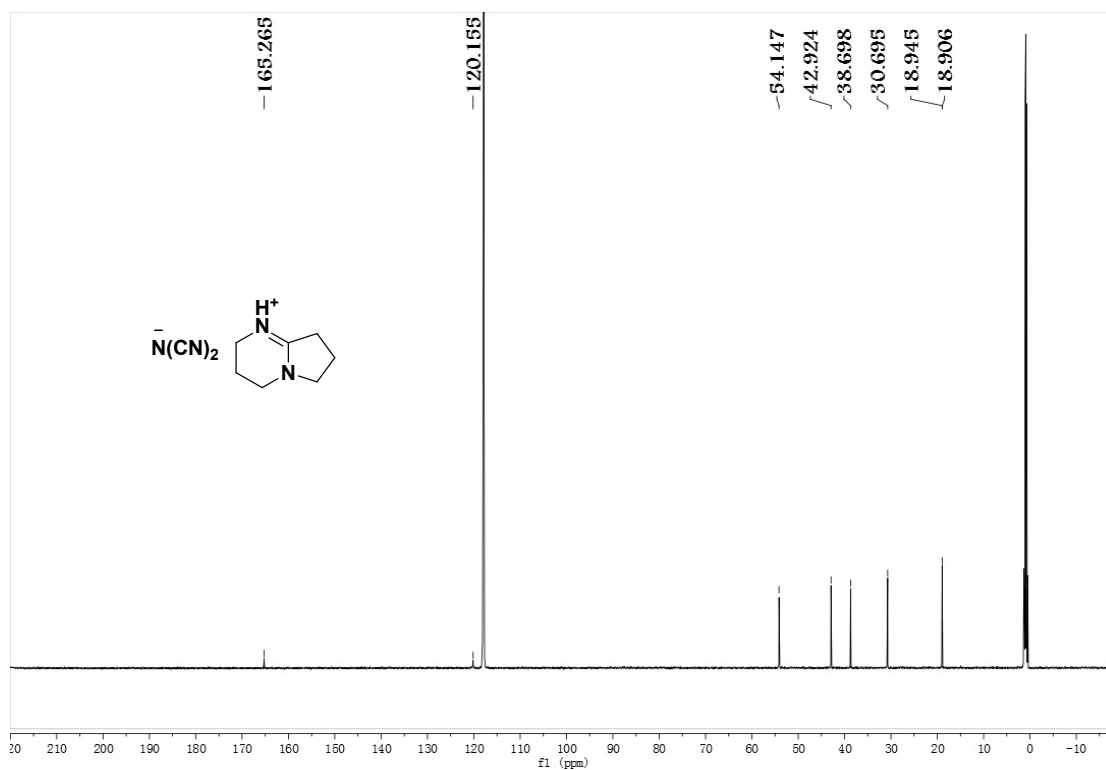

Figure S9.  $^{13}\text{C NMR}$  of IL4

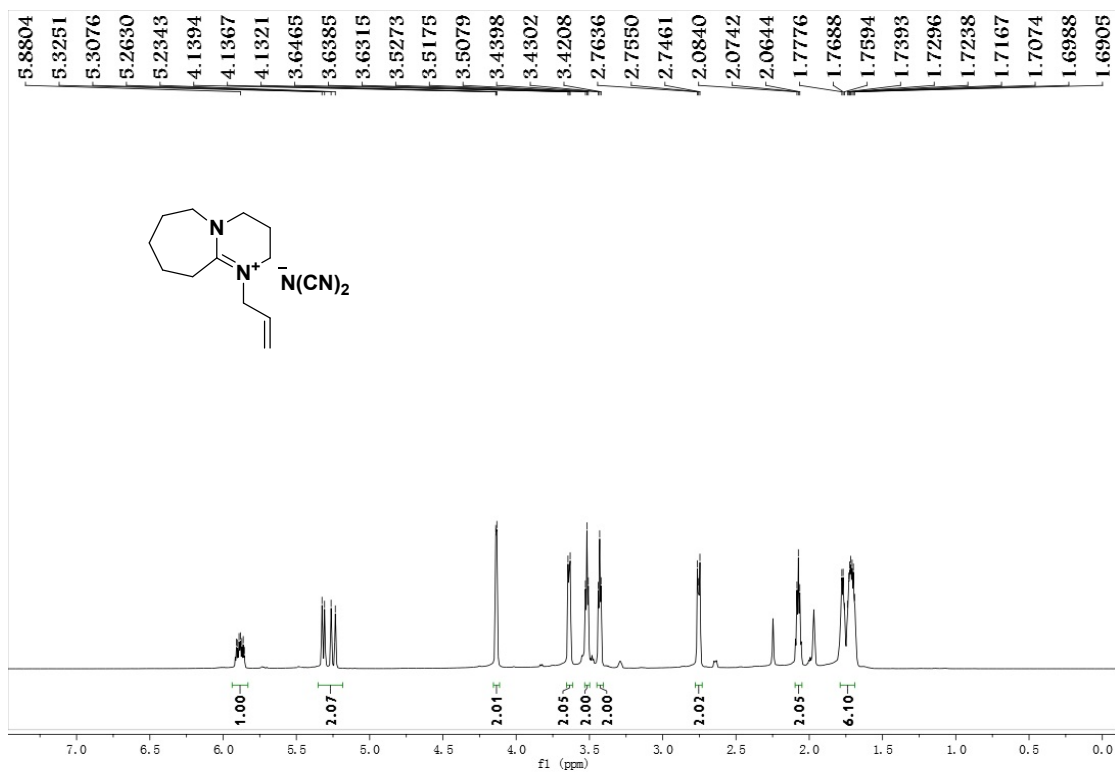

Figure S10. <sup>1</sup>H NMR of IL5

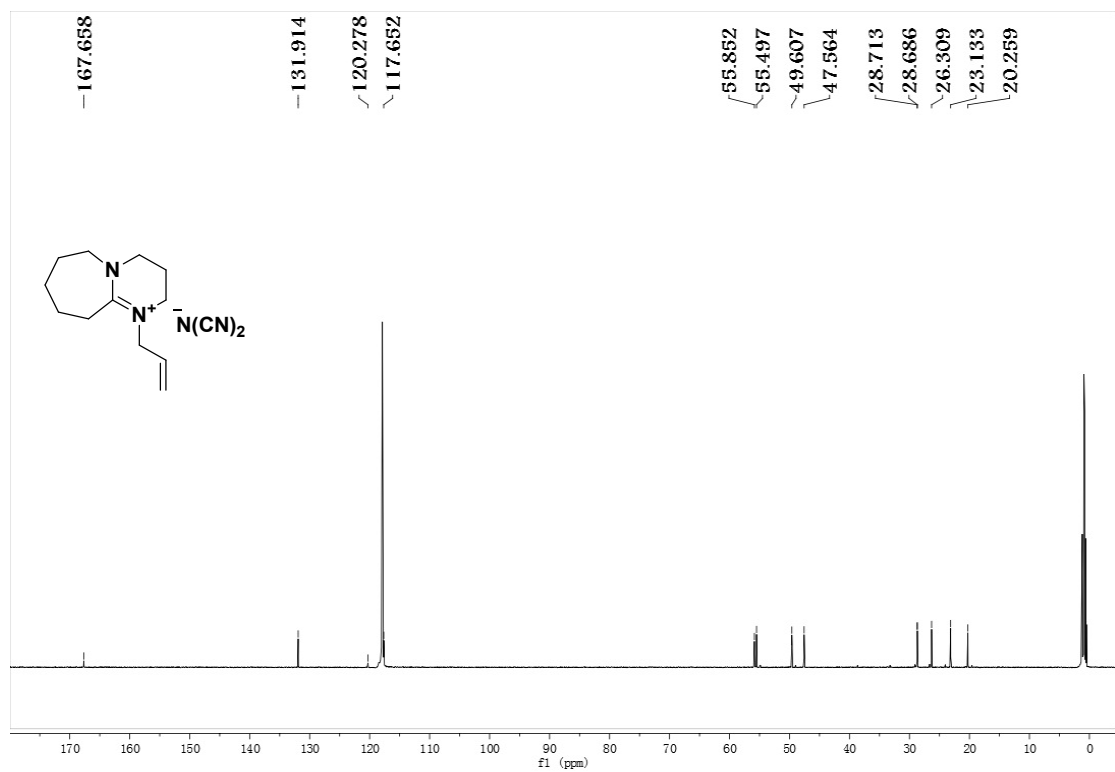

Figure S11. <sup>13</sup>C NMR of IL5

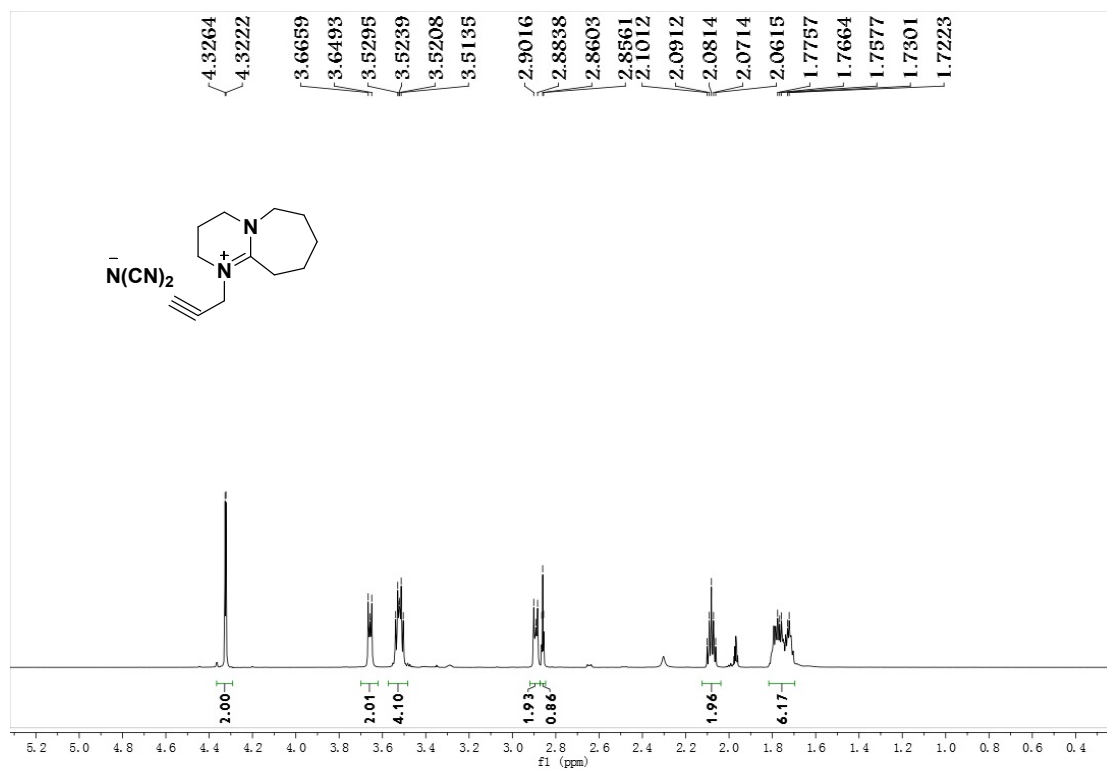

Figure S12.  $^1\text{H}$  NMR of IL6

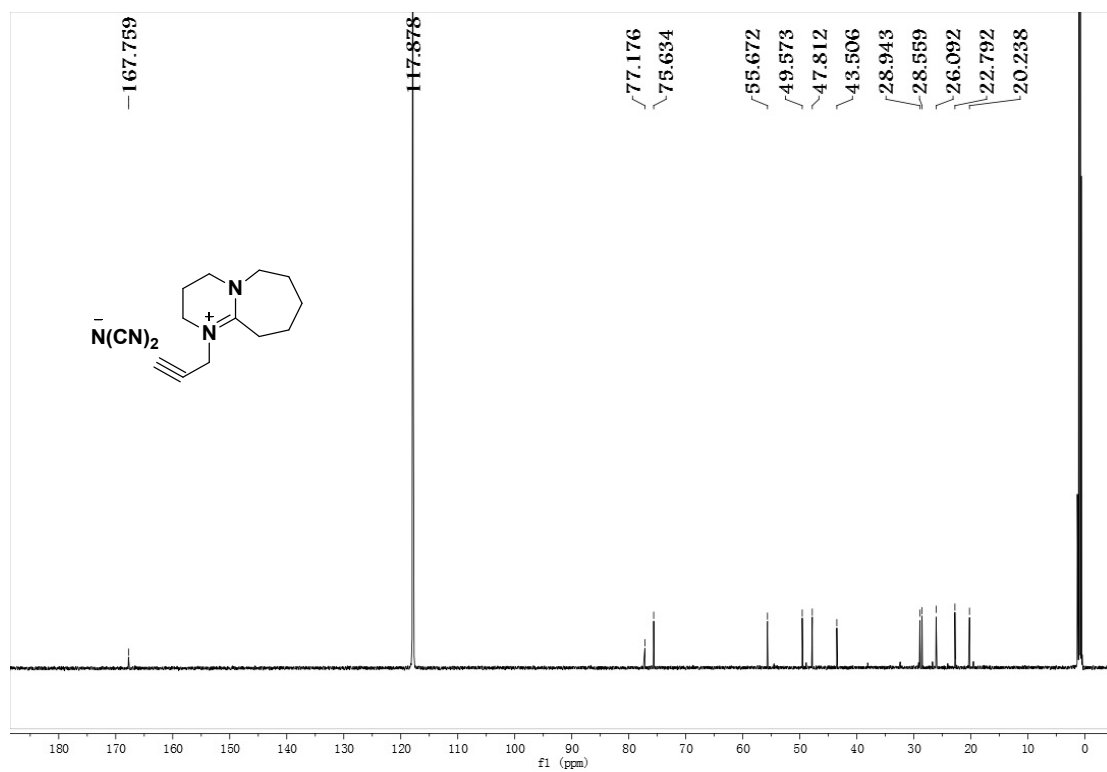

Figure S13.  $^{13}\text{C}$  NMR of IL6



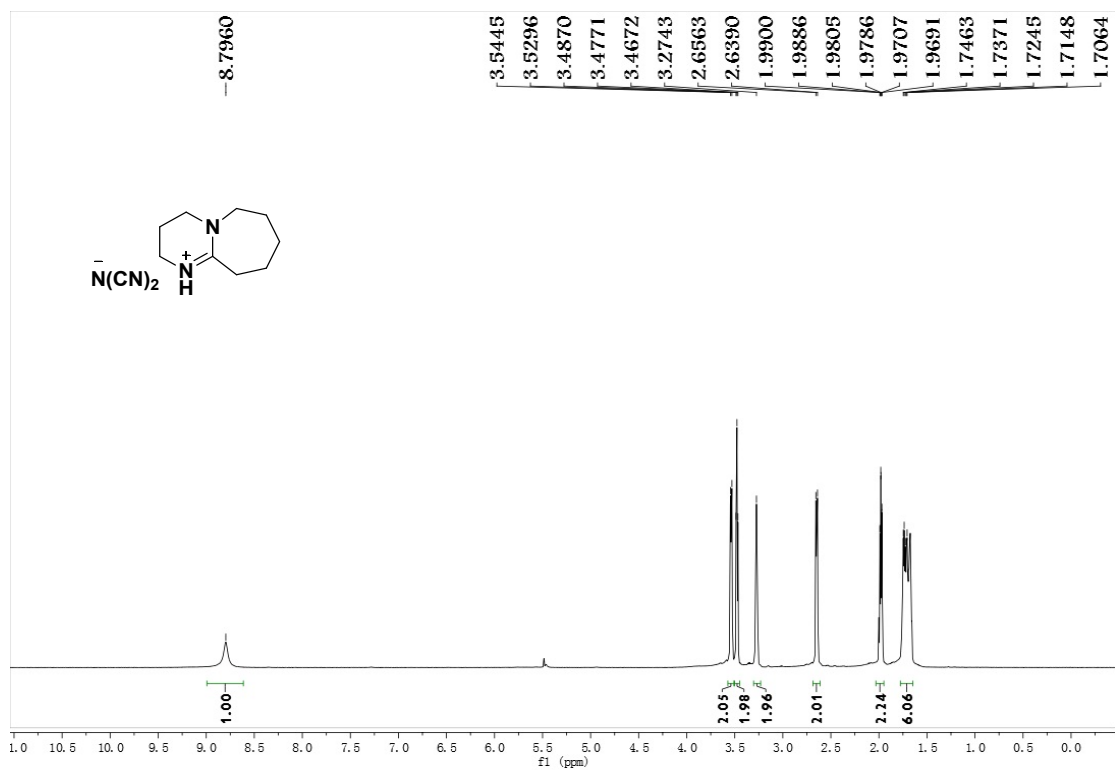

Figure S14.  $^1\text{H}$  NMR of IL7

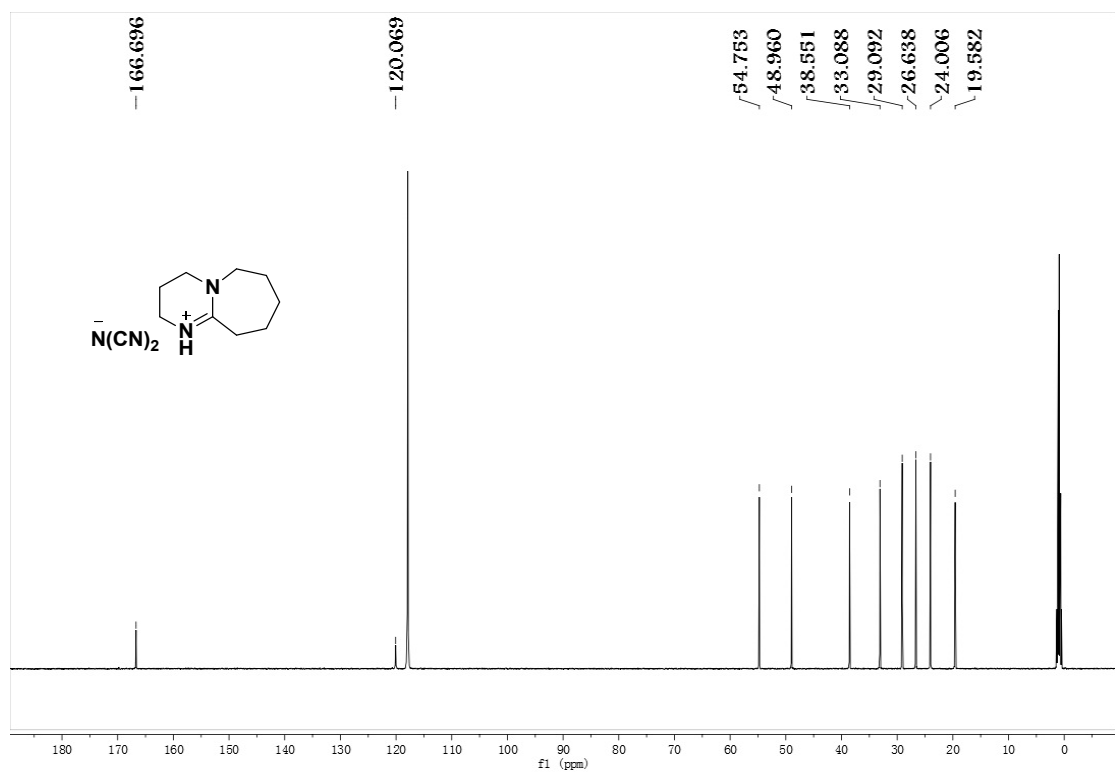

Figure S15.  $^{13}\text{C}$  NMR of IL7

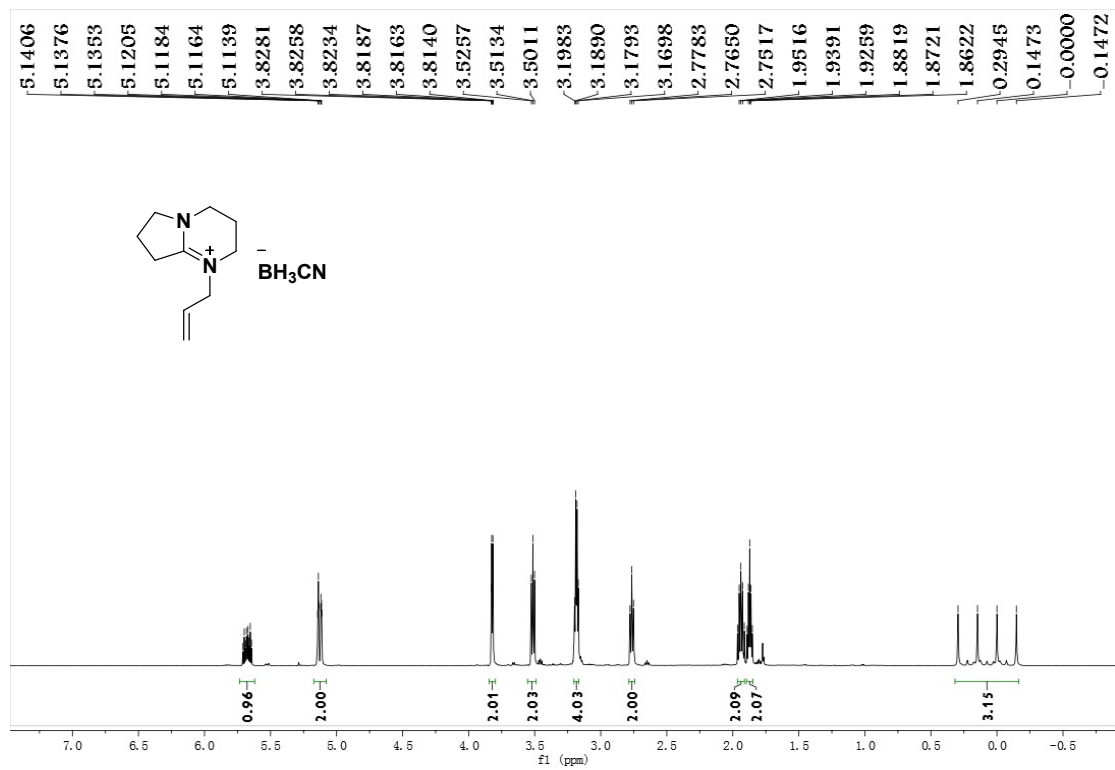

Figure S16. <sup>1</sup>H NMR of IL8

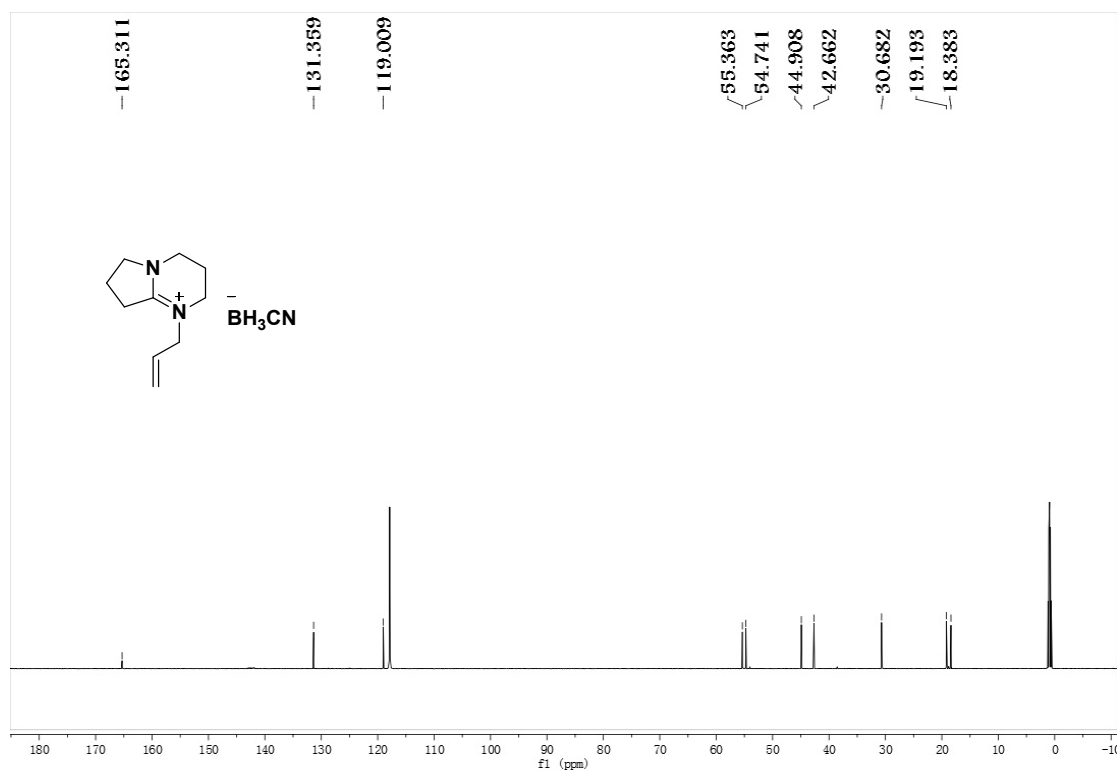

Figure S17. <sup>13</sup>C NMR of IL8

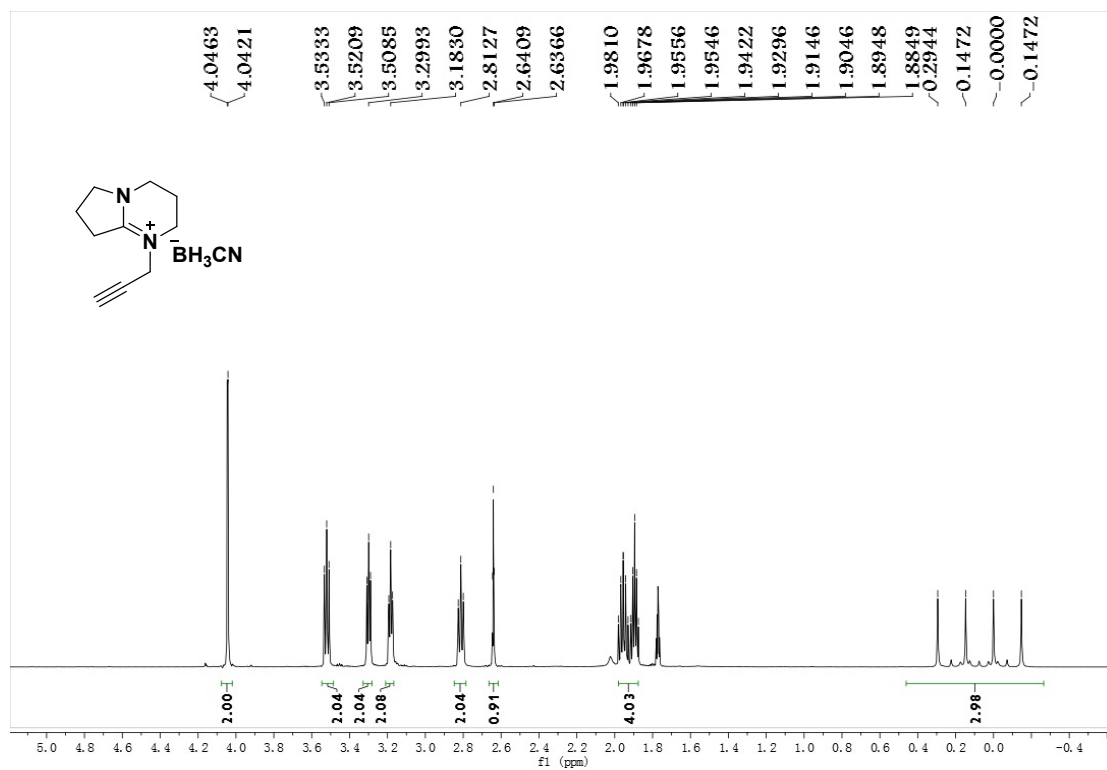

Figure S18.  $^1\text{H}$  NMR of IL9

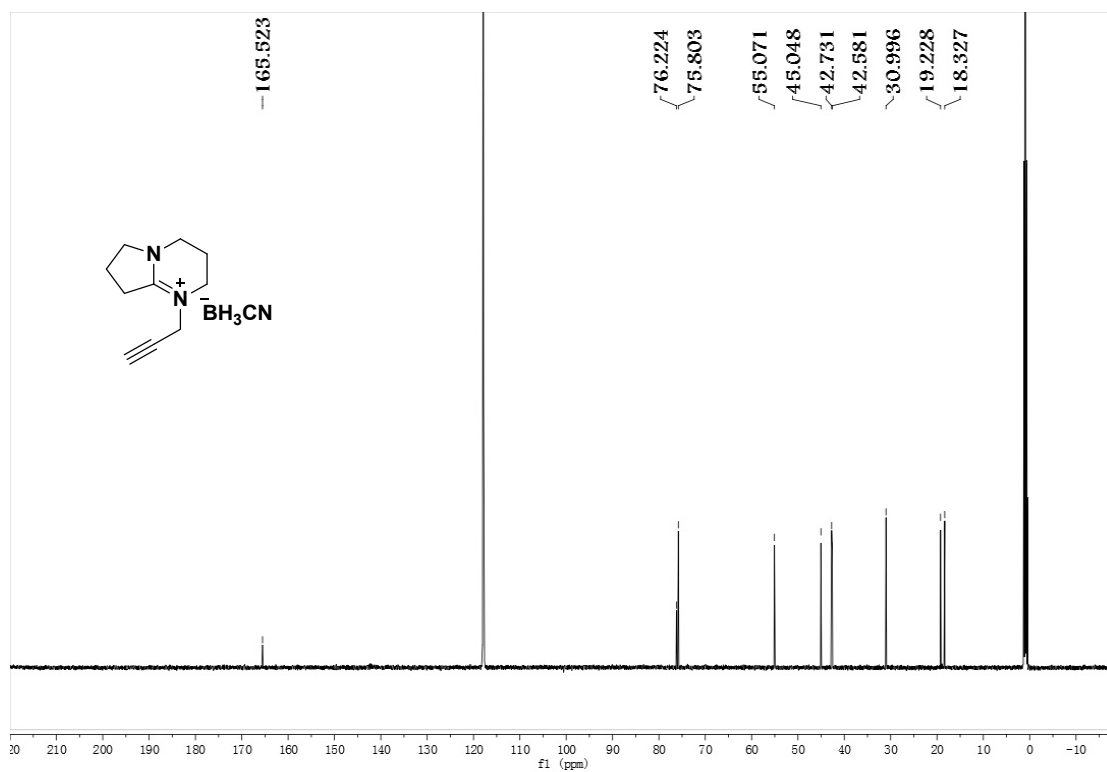

Figure S19.  $^{13}\text{C}$  NMR of IL9

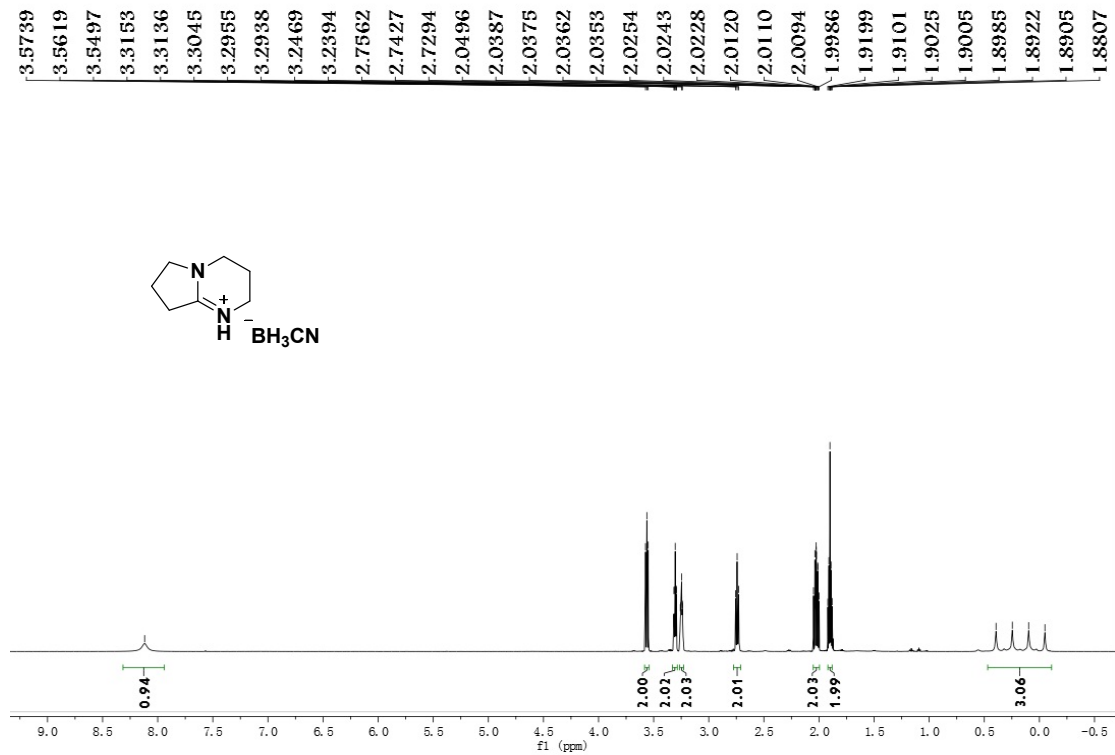

Figure S20. <sup>1</sup>H NMR of IL10

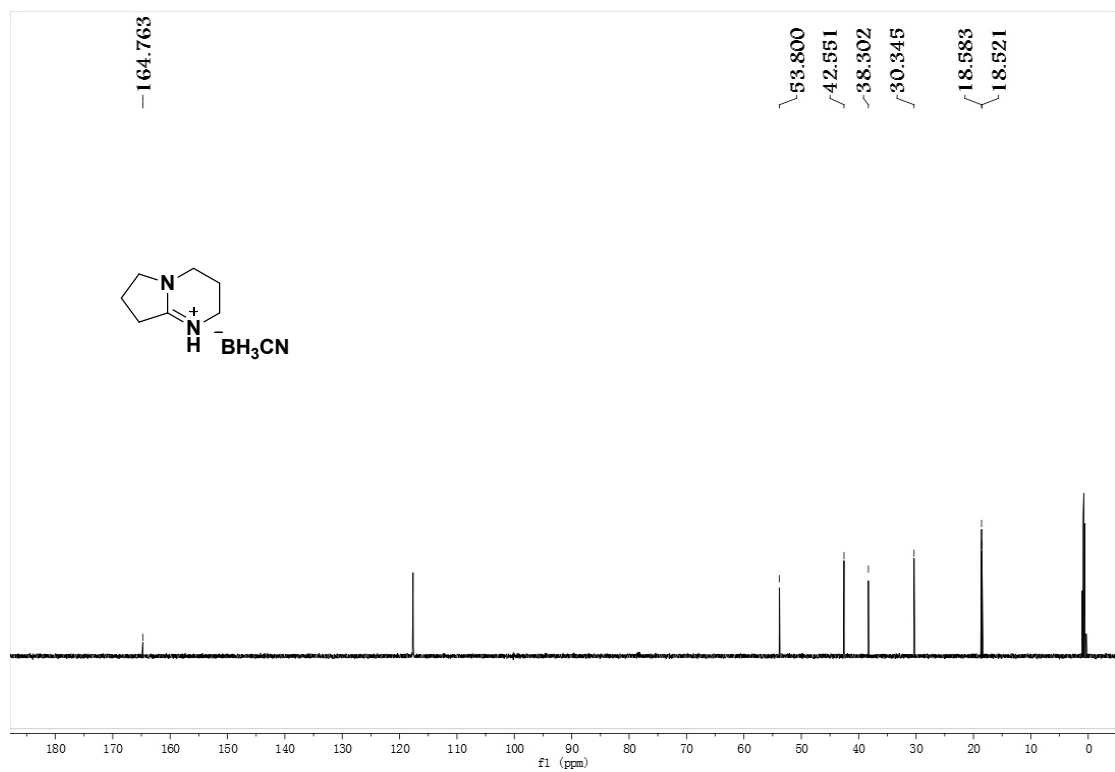

Figure S21. <sup>13</sup>C NMR of IL10

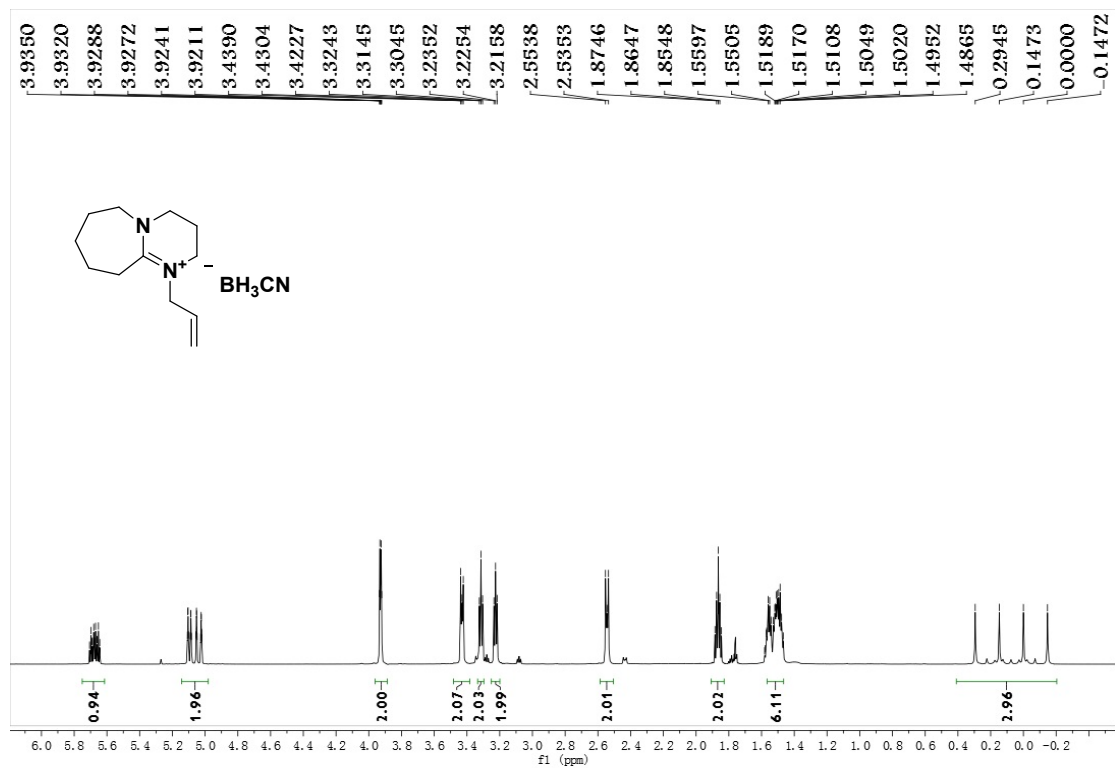

Figure S22. <sup>1</sup>H NMR of IL11

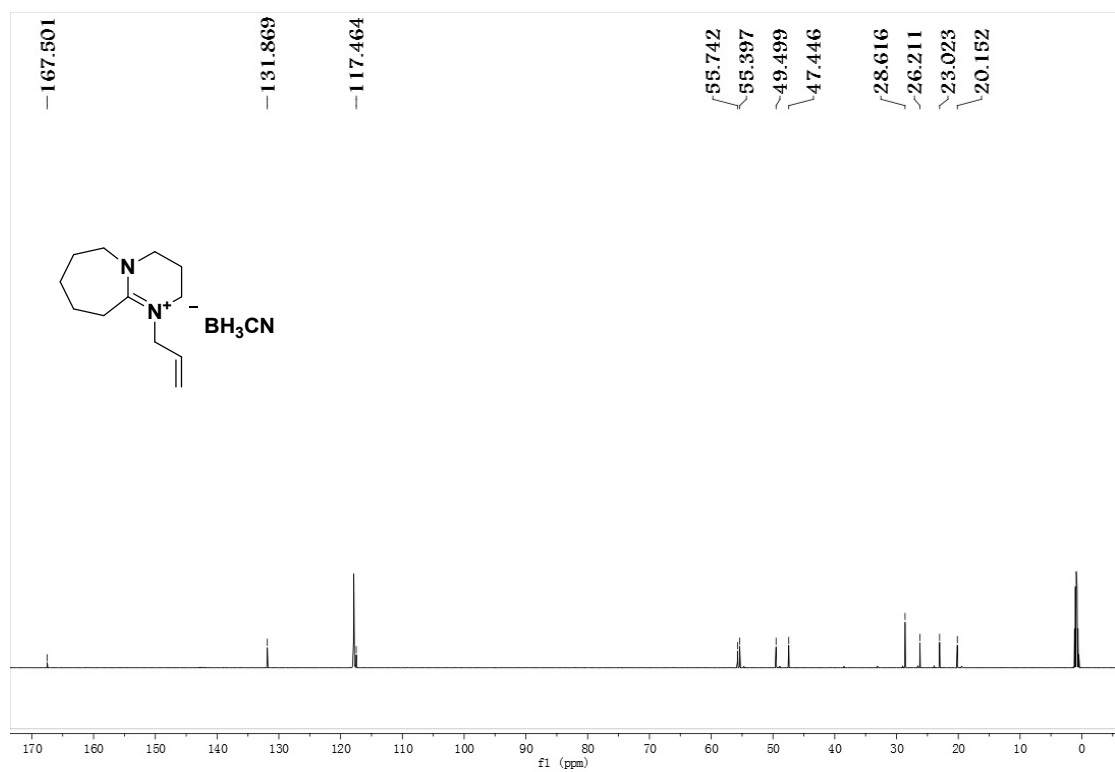

Figure S23. <sup>13</sup>C NMR of IL11

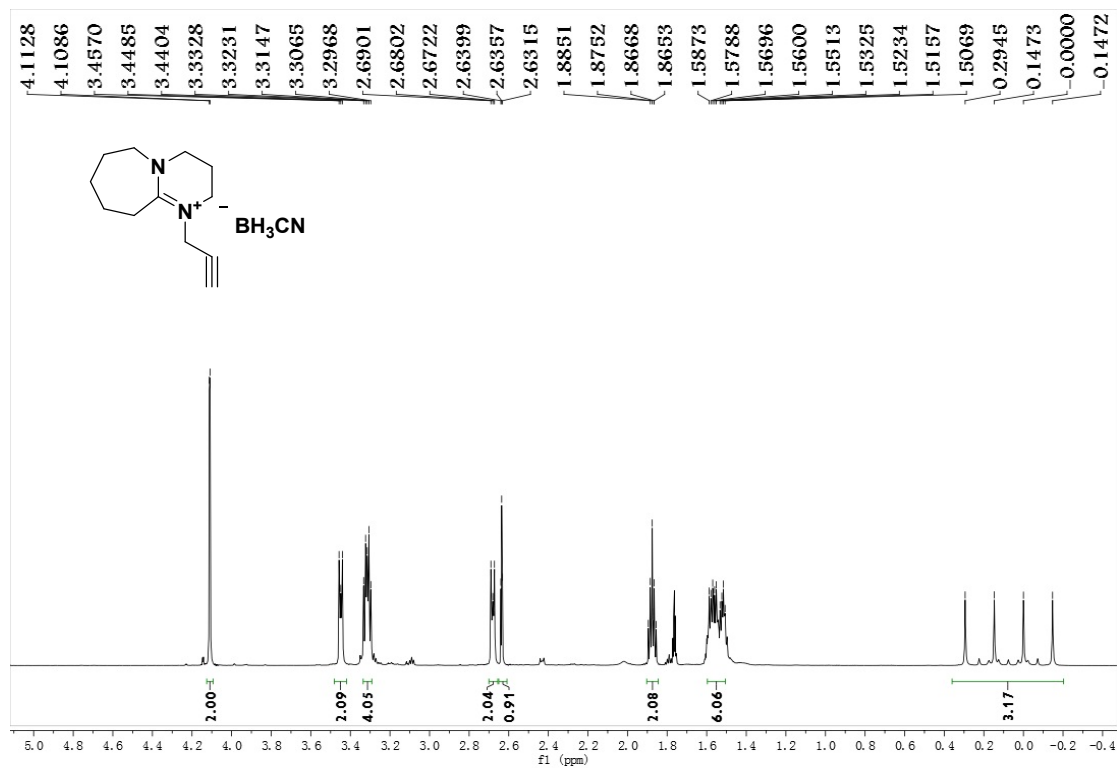

Figure S24.  $^1\text{H}$  NMR of IL12

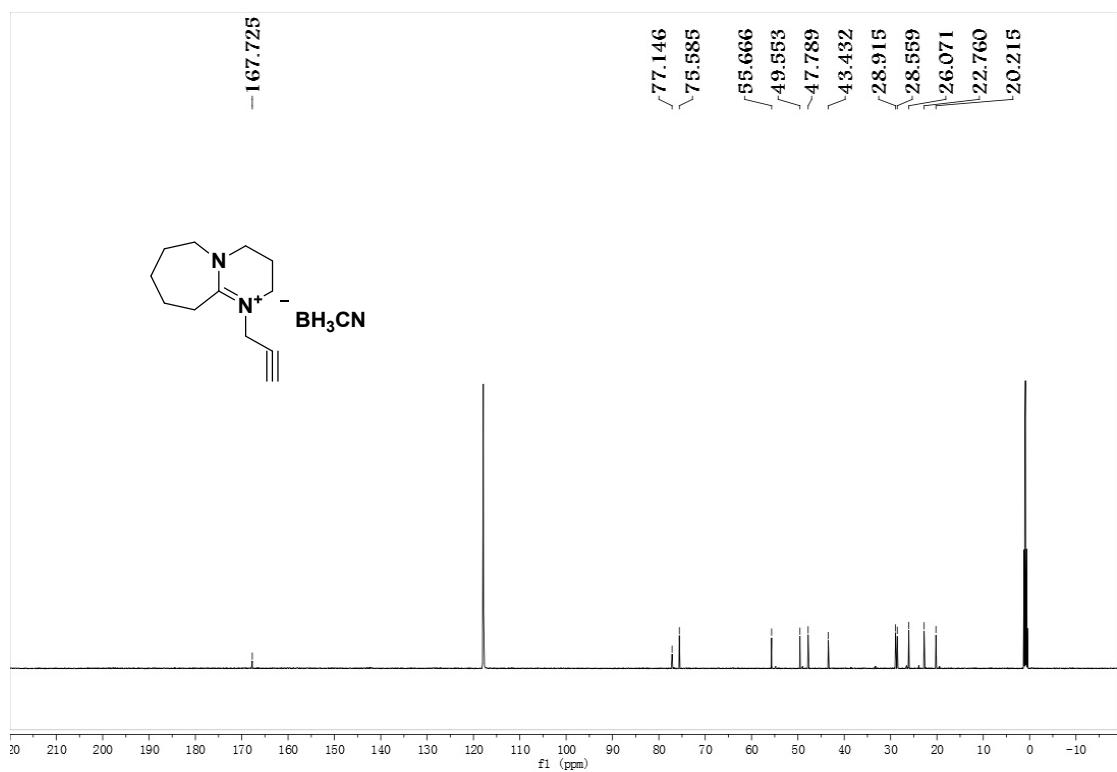

Figure S25.  $^{13}\text{C}$  NMR of IL12

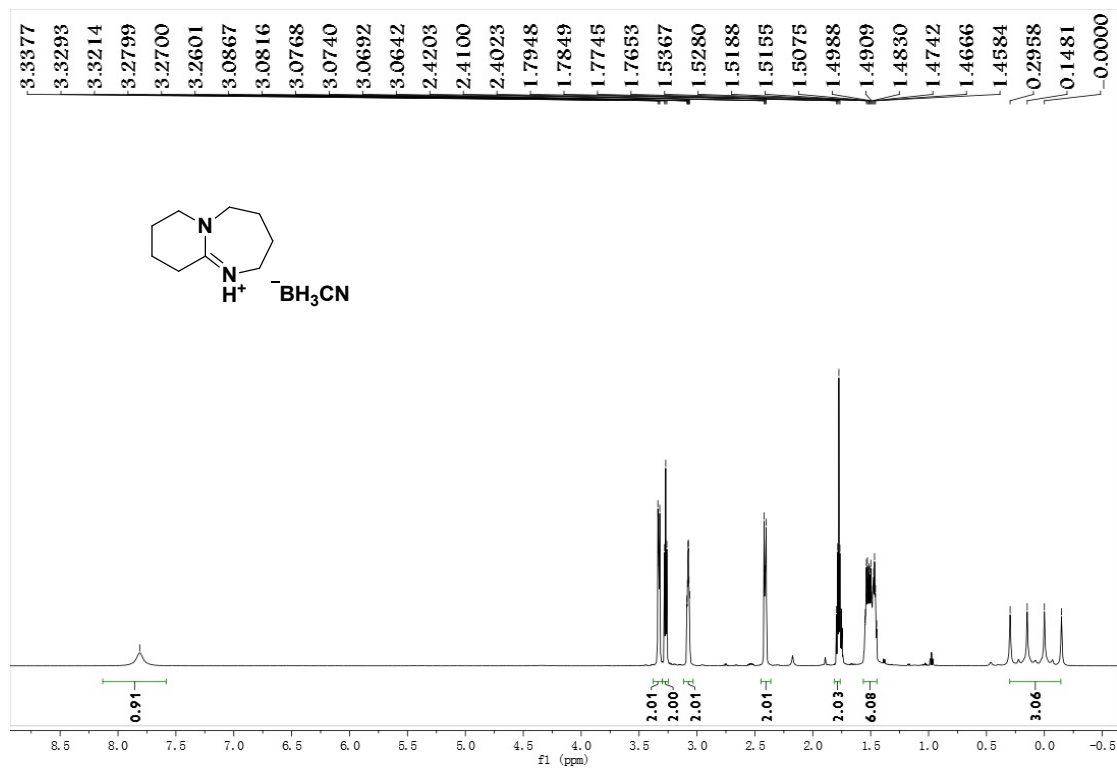

Figure S26. <sup>1</sup>H NMR of IL13

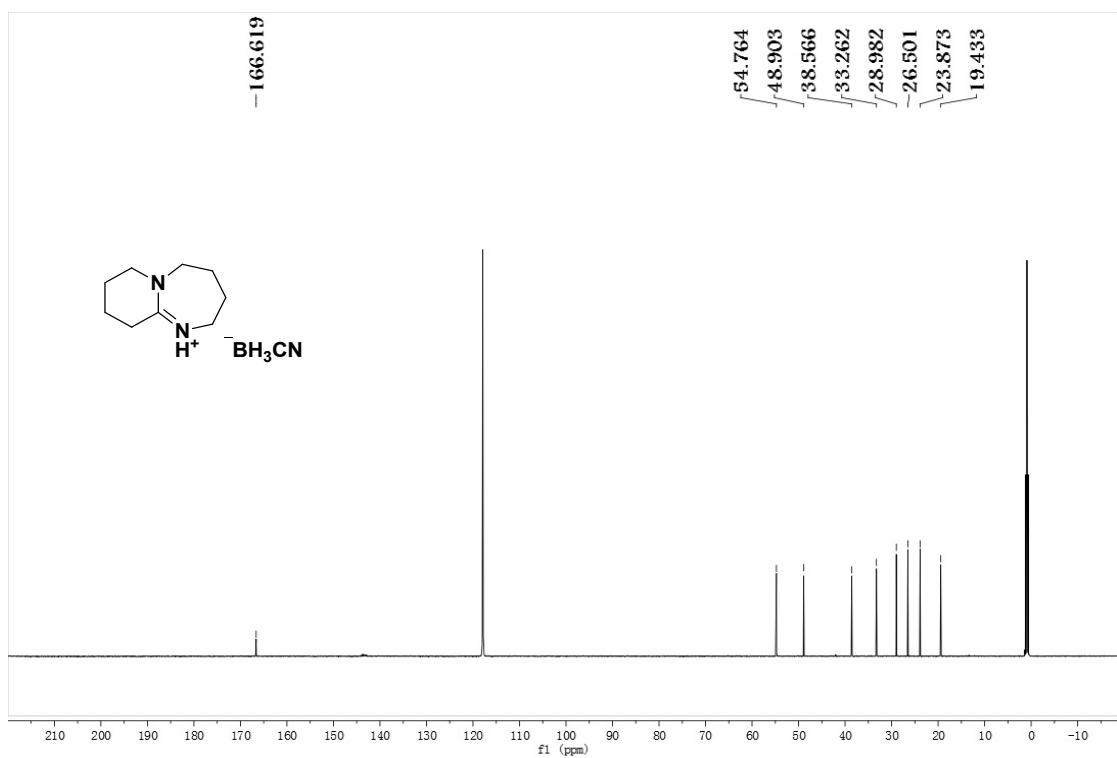

Figure S27. <sup>13</sup>C NMR of IL13

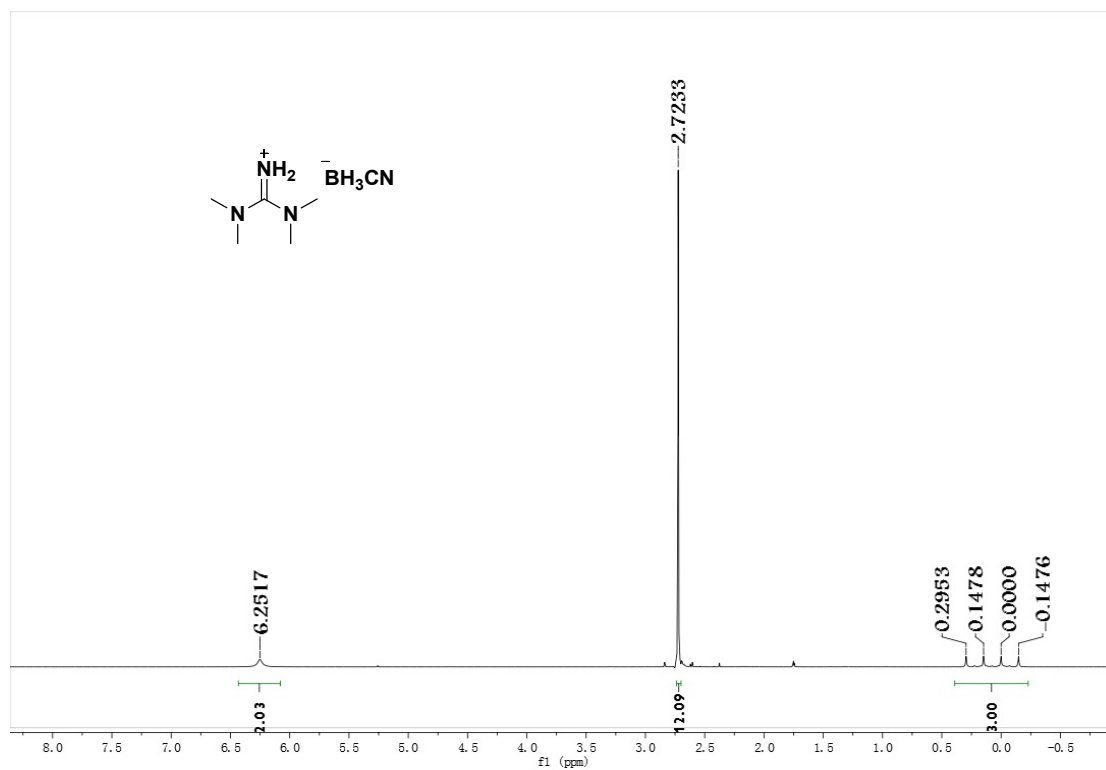

Figure S28. <sup>1</sup>H NMR of IL14

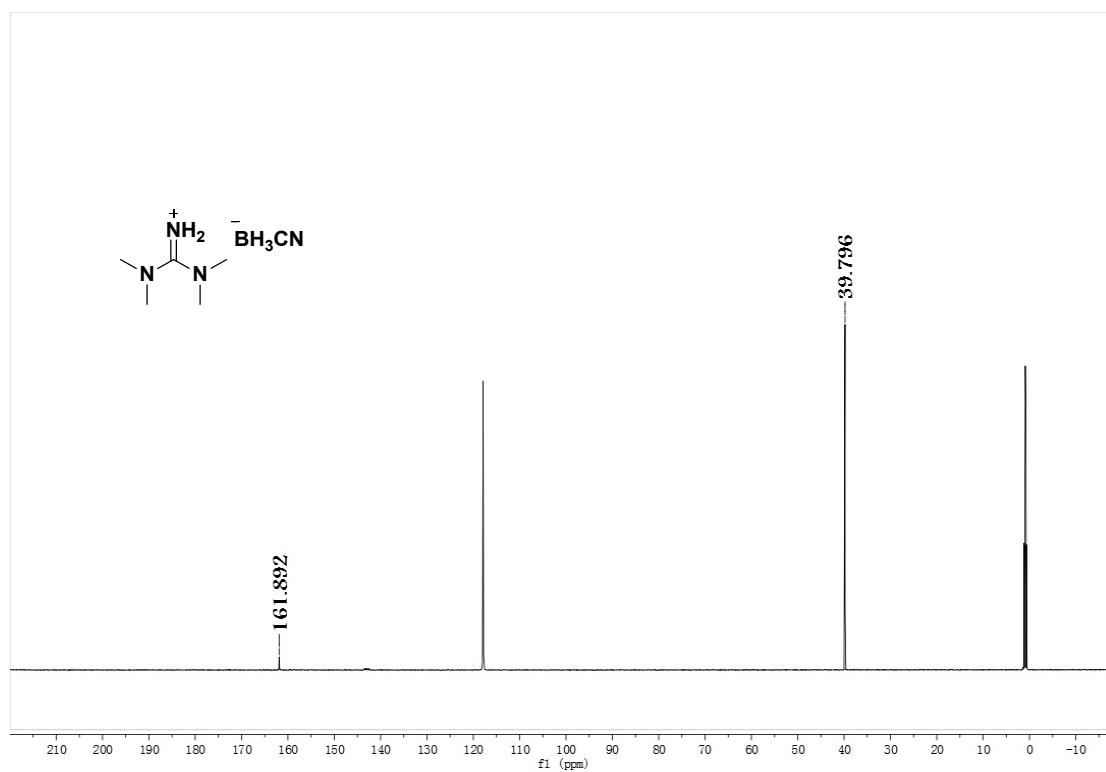

Figure S29. <sup>13</sup>C NMR of IL14
